# Supplementary material for: Transient IGF-1R inhibition combined with osimertinib eradicates AXL-low expressing EGFR mutated lung cancer
Source: PubMed Central journal article supplement (PMC7490421; doi:10.1038/s41467-020-18442-4), 2020-09-14
Supplement: 41467_2020_18442_MOESM1_ESM.pdf [file 41467_2020_18442_MOESM1_ESM.pdf]

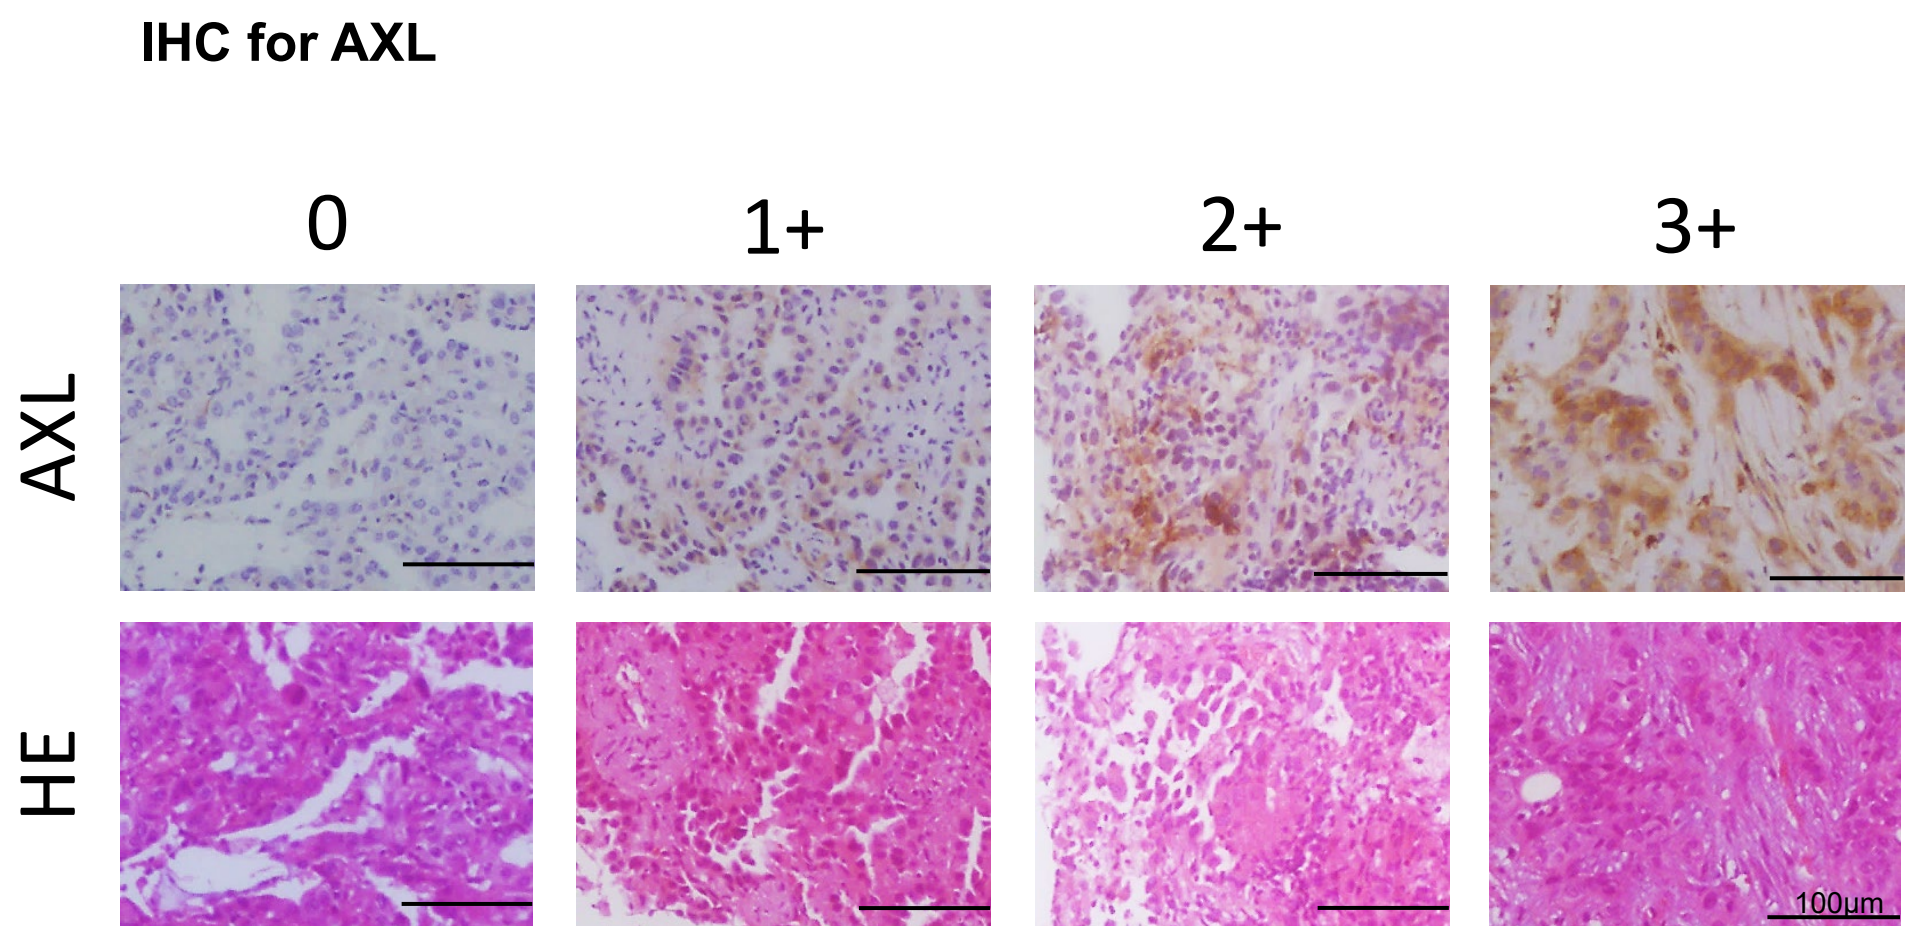

**Supplementary Figure 1.** Representative results of immunohistochemical staining for AXL expression. Bar, 100  $\mu$ m.

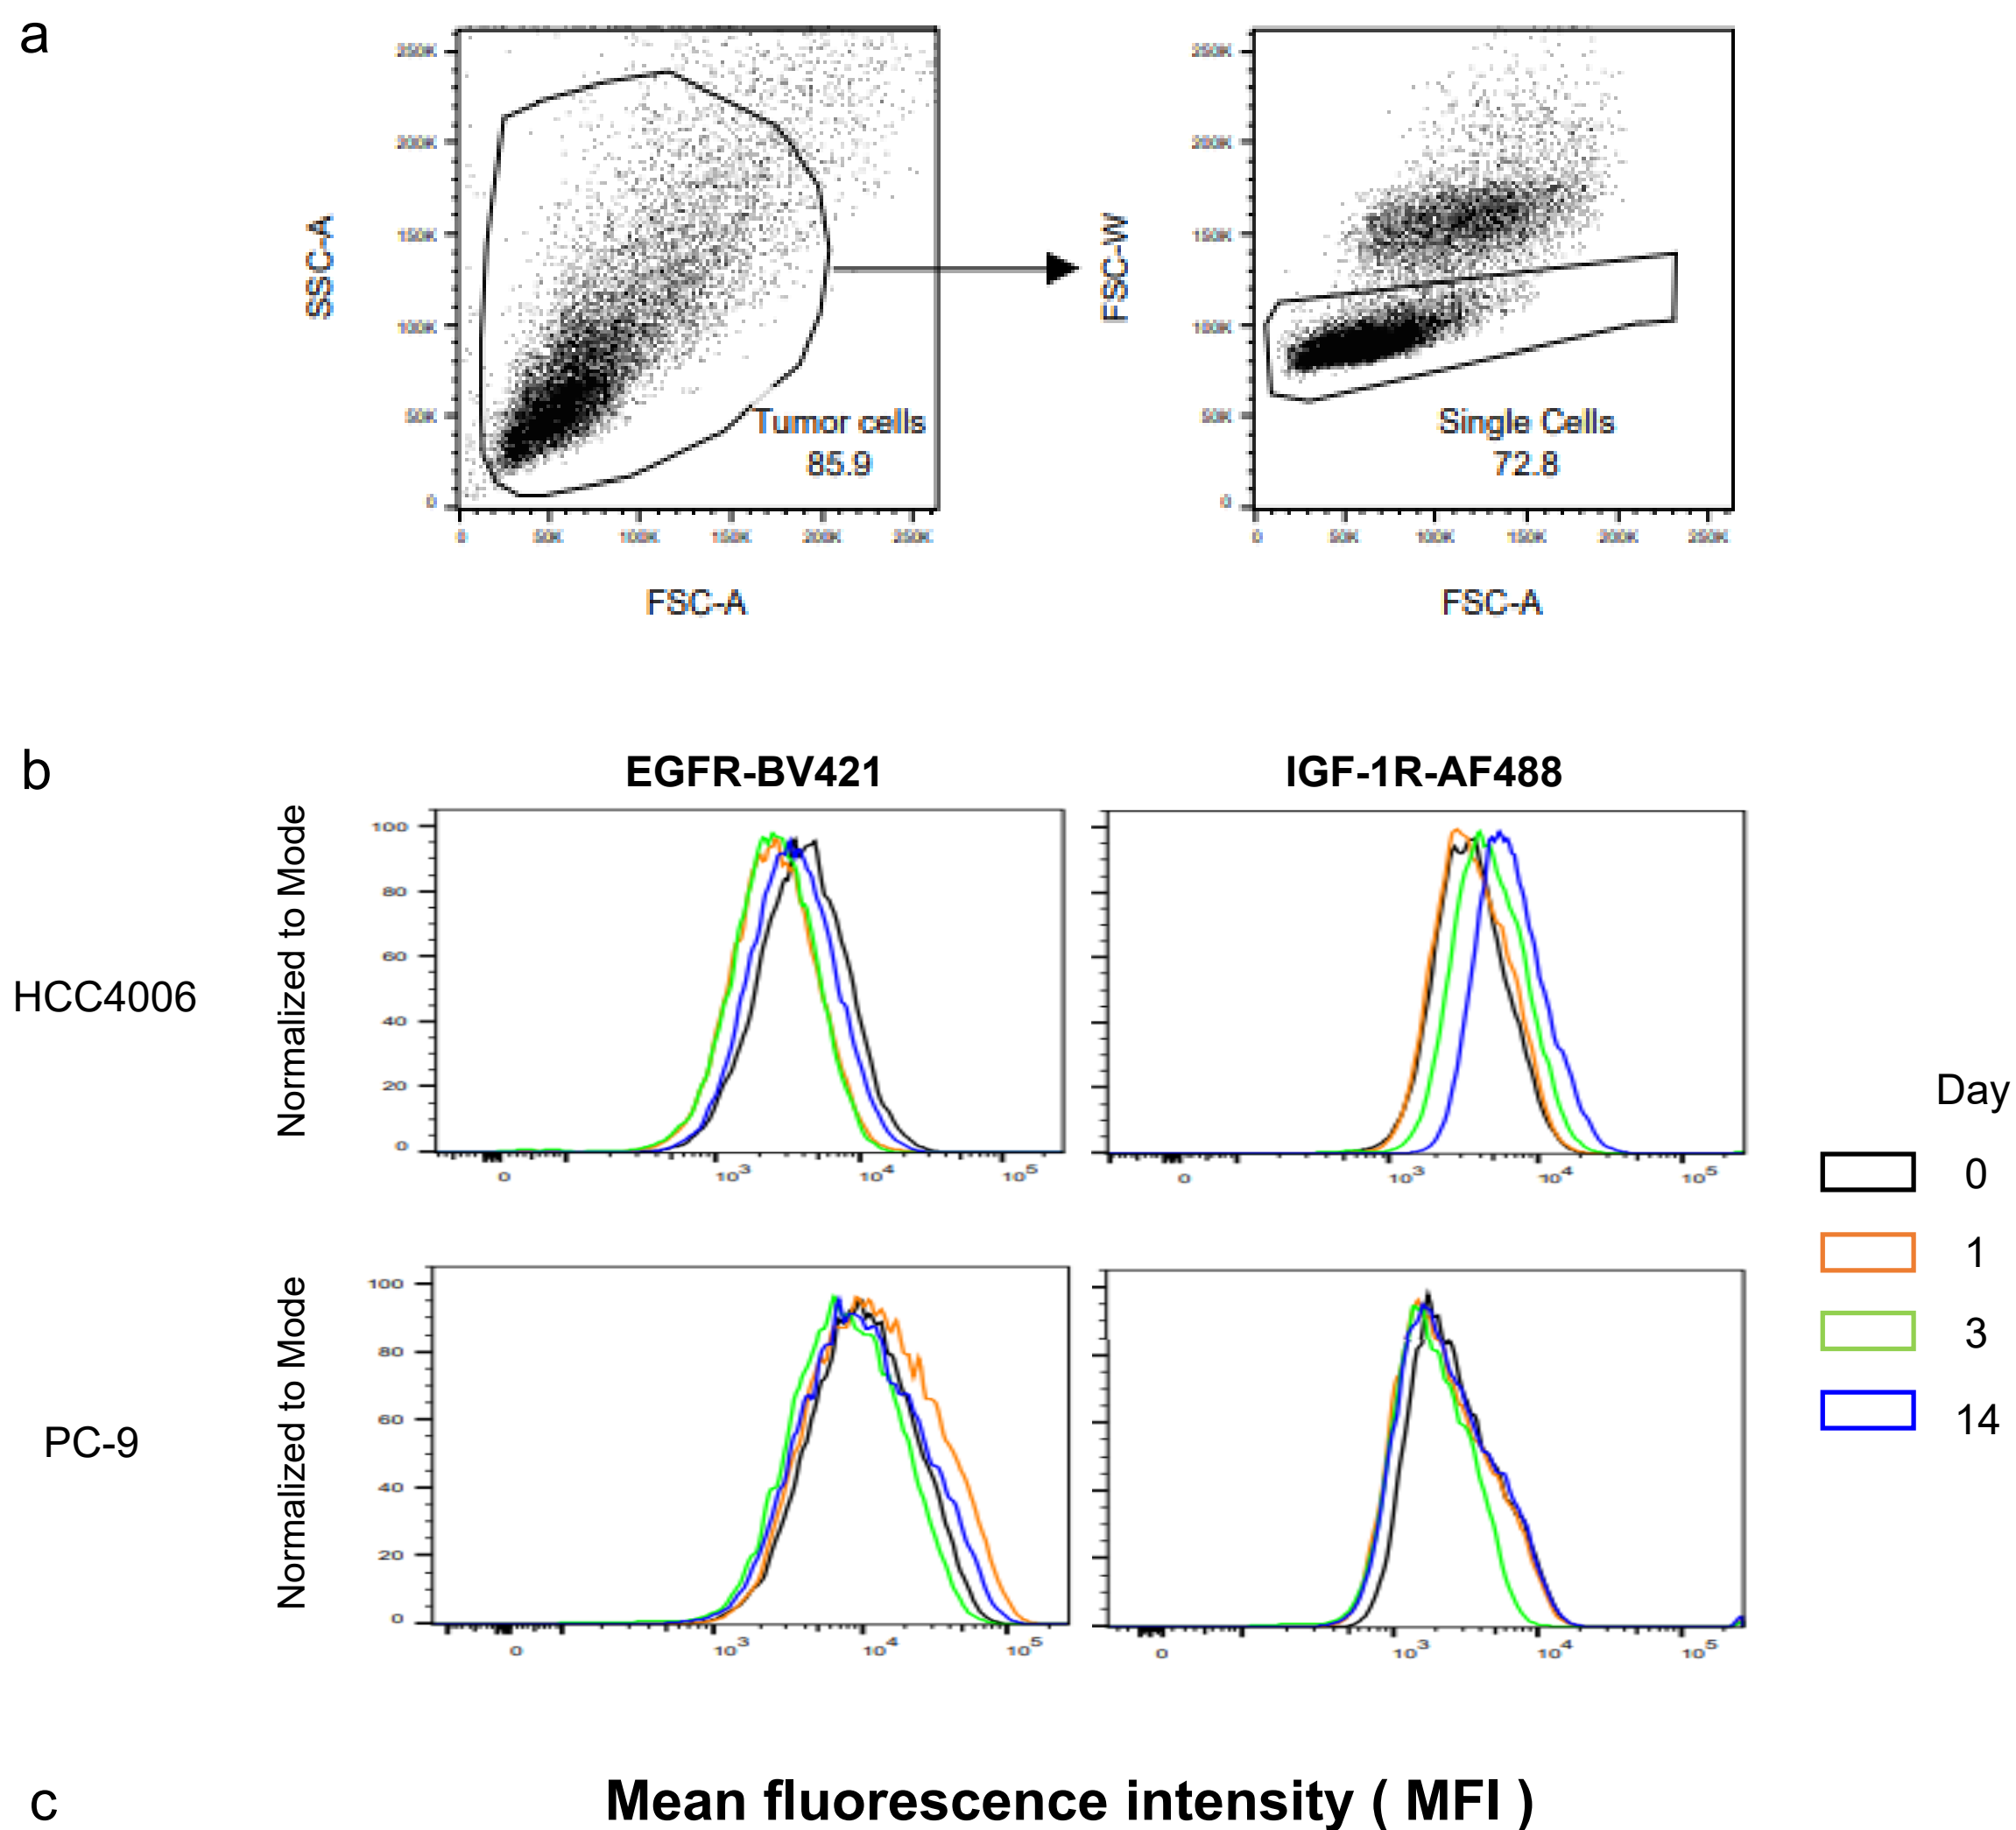

| Day | HCC4006 |      | PC-9   |       |
|-----|---------|------|--------|-------|
|     | IGF-1R  | EGFR | IGF-1R | EGFR  |
| 0   | 4087    | 5032 | 3858   | 13643 |
| 1   | 4313    | 3135 | 3652   | 18752 |
| 3   | 5690    | 3017 | 2788   | 10605 |
| 14  | 7697    | 4219 | 3945   | 15045 |

**Supplementary Figure 2. Expression of IGF-1R and EGFR in osimertinib treated *EGFR* mutated NSCLC cell lines determined by flow cytometry.** **a** Tumor cell lines were gated on single cell gates followed by FSC-A/SSC-A tumor cells population. **b** HCC4006 and PC-9 cells were treated with osimertinib (0.3  $\mu\text{mol/L}$  and 3  $\mu\text{mol/L}$ , respectively) for 14 days. At indicated time points, the cells were harvested and treated with anti-EGFR or anti-IGF-1R antibody for 30 min on ice. Then, the cells were washed three times and treated with a secondary antibody for 30 min on ice. The protein expression was determined by flow cytometry. **c** The mean fluorescence intensity is shown. Data shown are representative of three independent experiments.

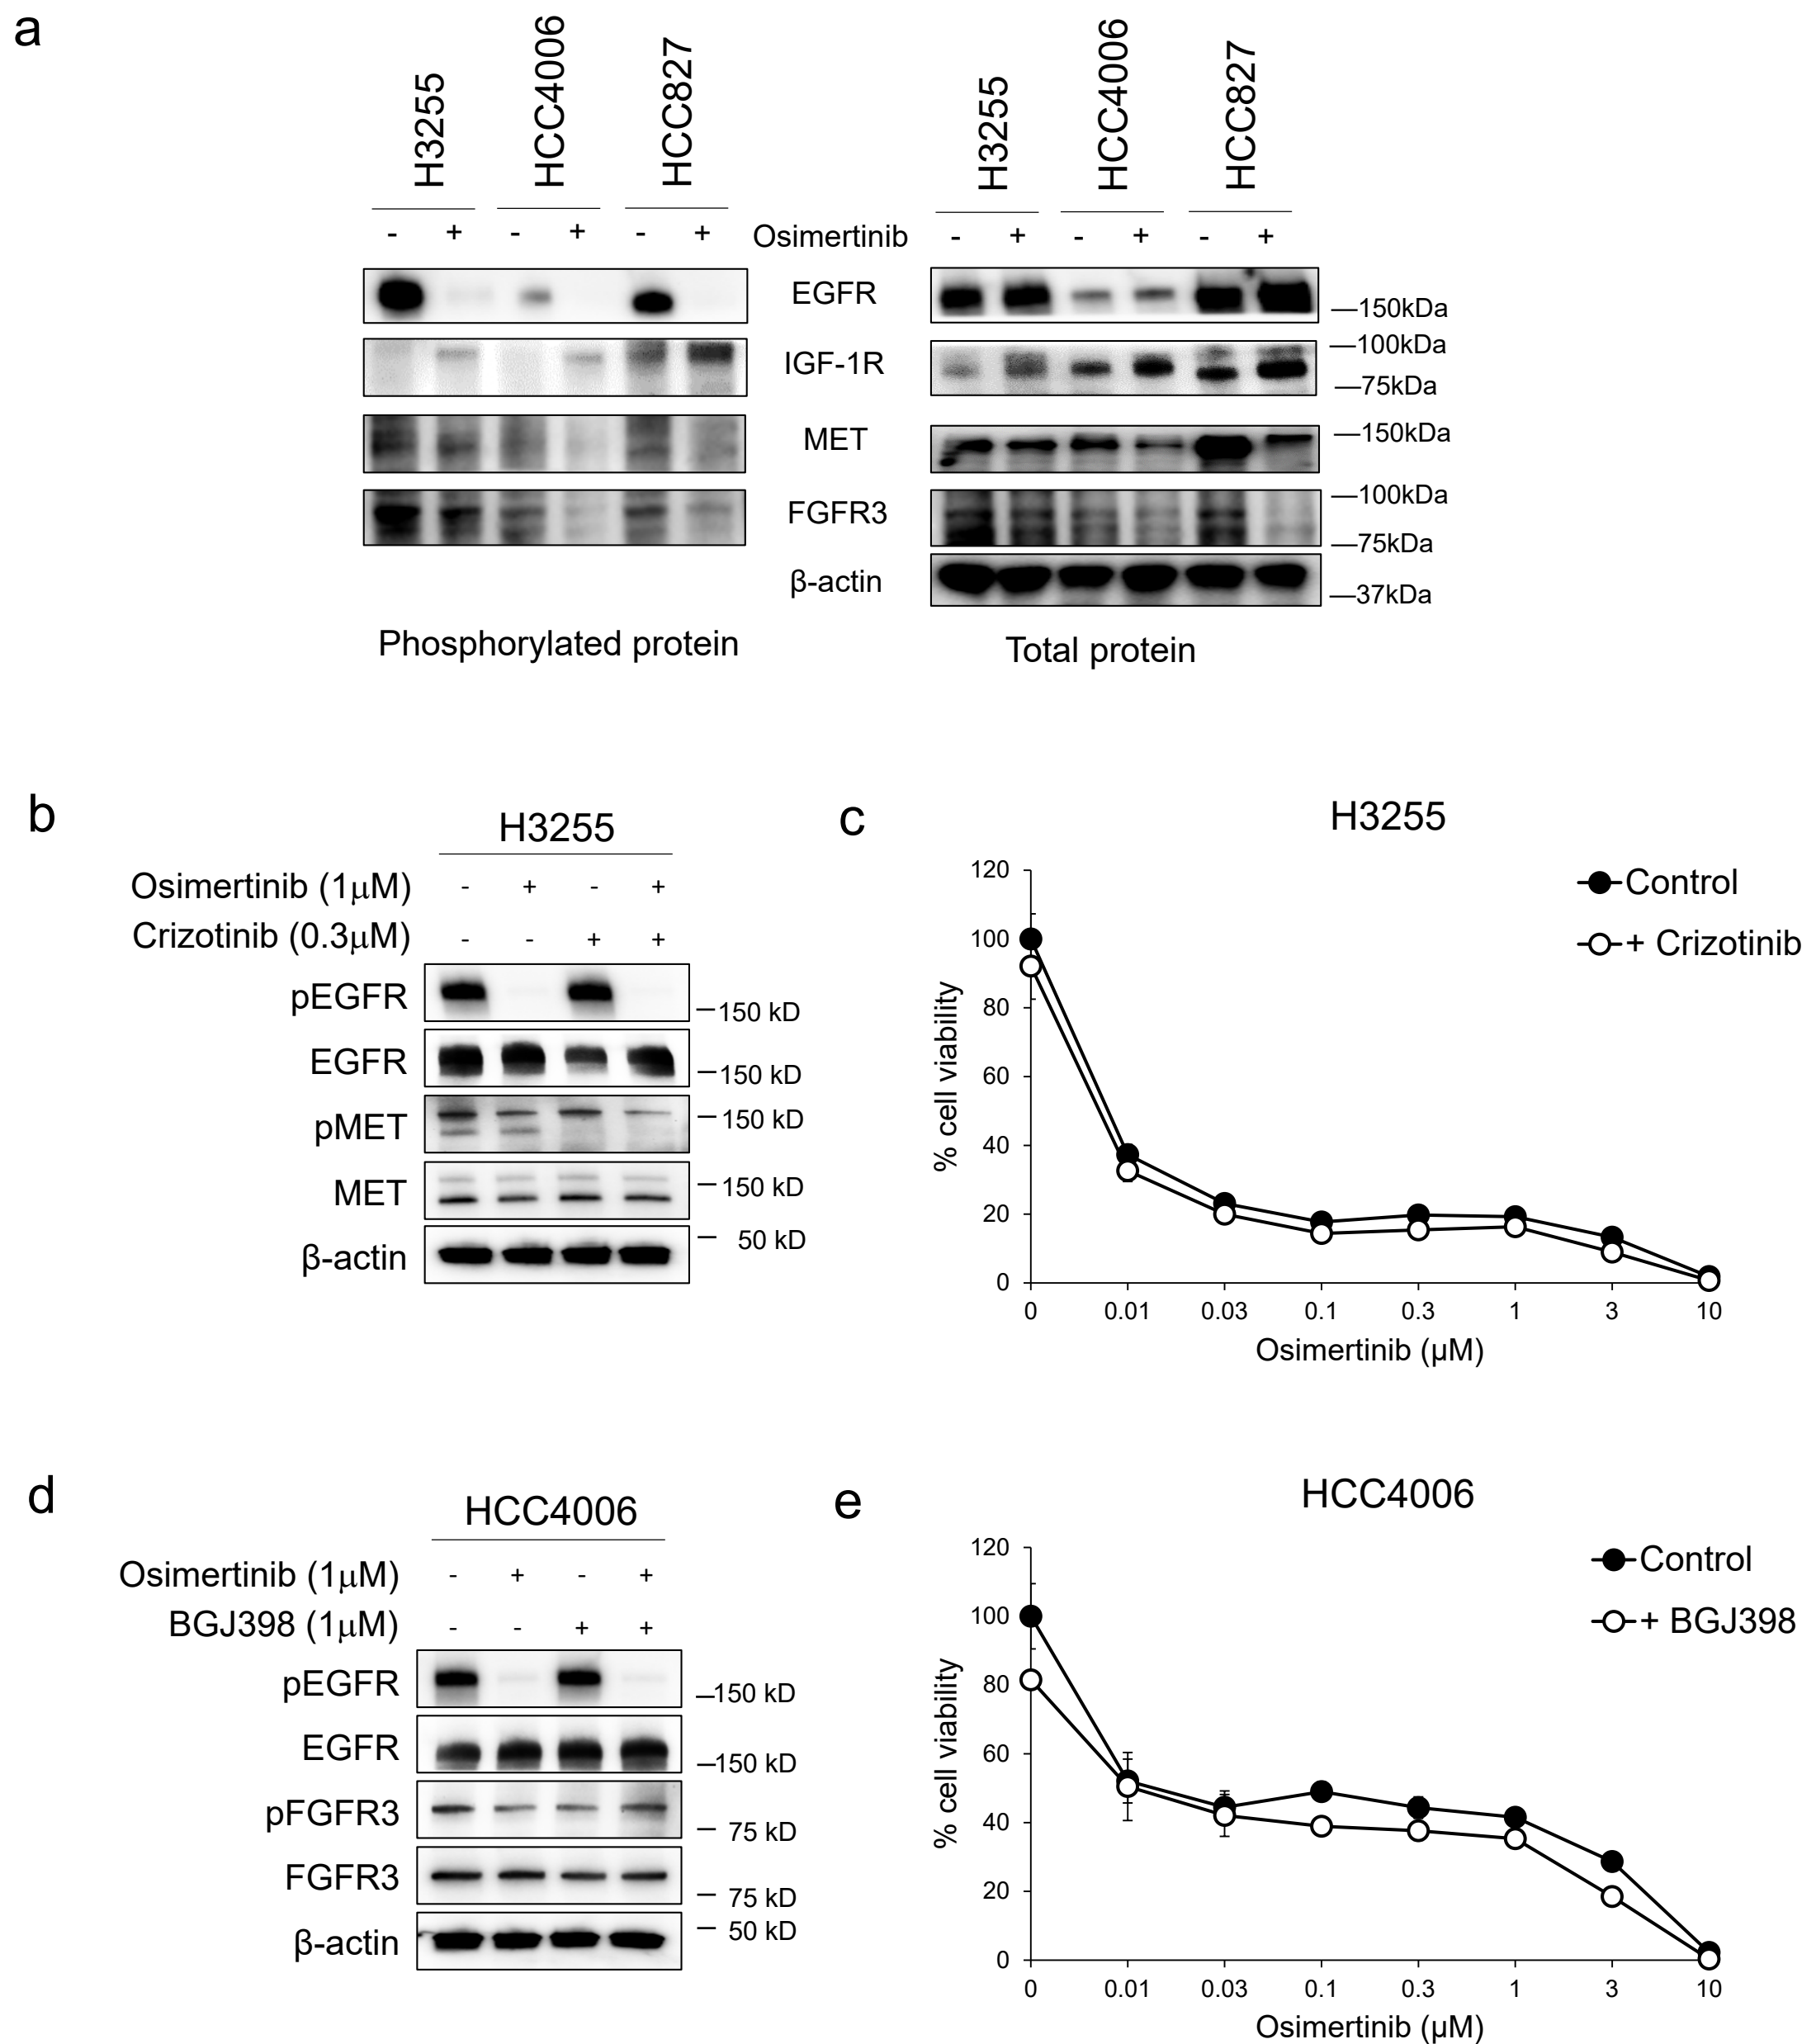

**Supplementary Figure 3. Role of MET and FGFR3 on sensitivity to osimertinib in H3255 and HCC4006 cells, respectively.** **a** *EGFR* mutated NSCLC cell lines were treated with osimertinib (30 nmol/L for HCC4006 and H3255 cells, 300 nmol/L for HCC827 cells) for 72 h, and lysates were analyzed by western blotting. **b** H3255 cells were treated with osimertinib and/or crizotinib (a MET inhibitor) for 1 h, and lysates were analyzed by western blotting. **c** H3255 cells were treated with osimertinib and/or crizotinib (0.3 $\mu$ mol/L) for 72 h, and cell viability was determined by MTT assay. **d** HCC4006 cells were treated with osimertinib and/or BJJ398 (a FGFR inhibitor) for 1 h, and lysates were analyzed by western blotting. **e** HCC4006 cells were treated with osimertinib and/or BJJ398 (1 $\mu$ mol/L) for 72 h, and cell viability was determined by MTT assay. Data shown are representative of three independent experiments. Data are represented as mean  $\pm$  s.d. Bars showed s.d.

## a. IHC for pIGF-1R

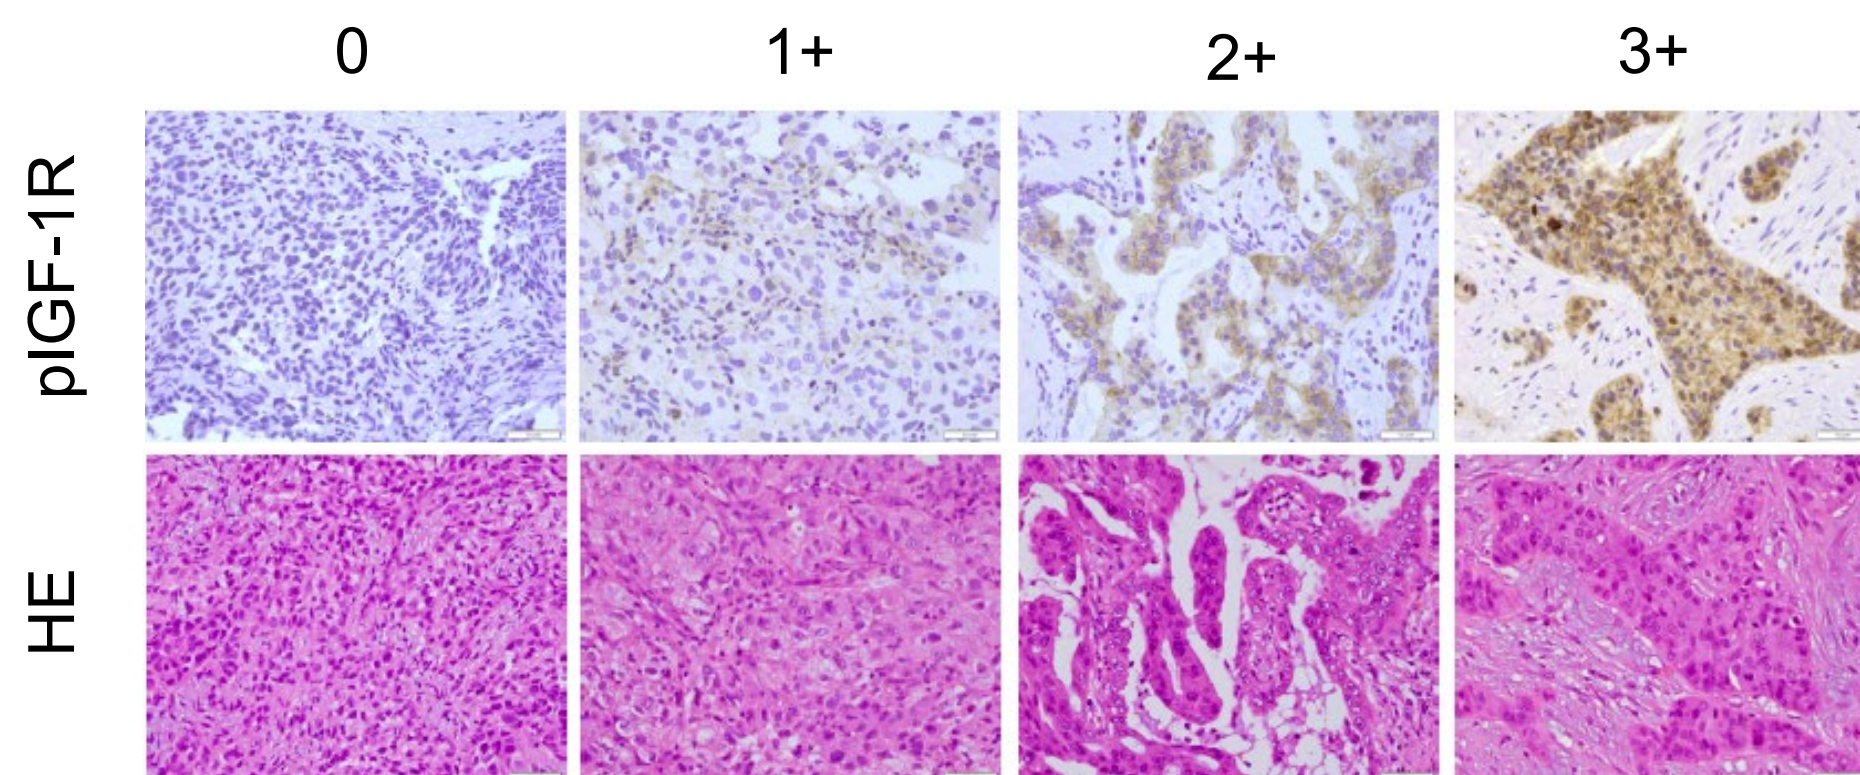

## b. Waterfall plot

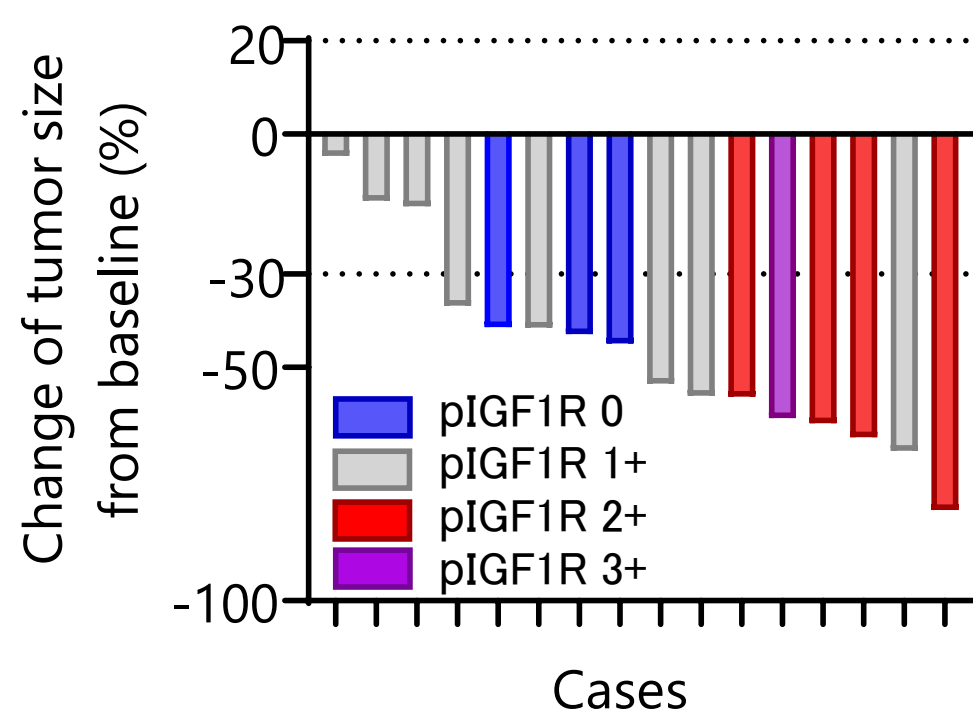

## c. pIGF-1R expression and tumor shrinkage

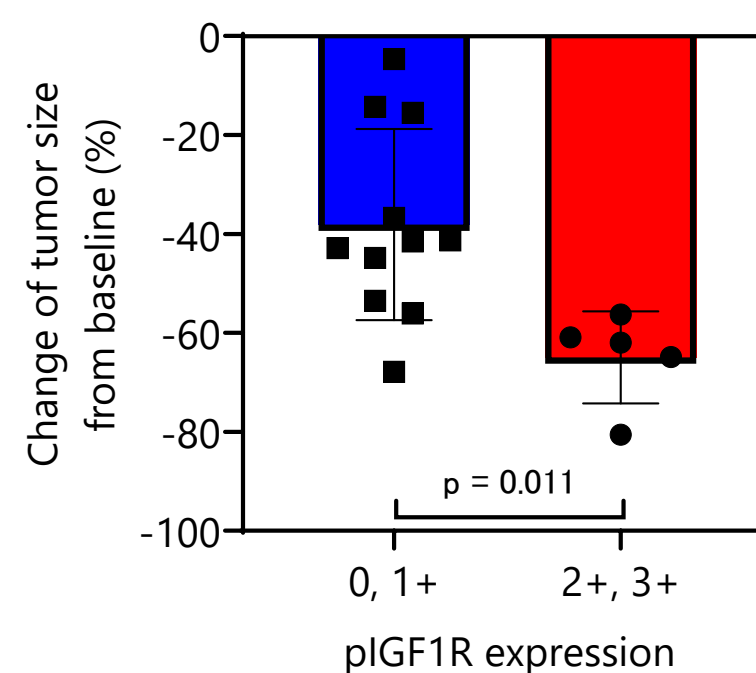

**Supplementary Figure 4. pIGF-1R expression correlates with osimertinib sensitivity in AXL-low expressing *EGFR* mutated NSCLC patients.** **a** Representative results of immunohistochemical staining for pIGF-1R expression. Bar, 100  $\mu$ m. **b** Correlation between the pIGF-1R expression, determined by IHC, and the response to osimertinib treatment in AXL-low expressing *EGFR* mutated NSCLC specimens from 16 patients. **c** Change of tumor size from baseline following osimertinib treatment in *EGFR* mutated NSCLC patients with low (no to 1+)-pIGF-1R expression (N=11) and high (2+ to 3+)-pIGF-1R expression (N=5). The data are expressed as mean and SDs. P=0.011 compared by two-sided Student's t-tests.

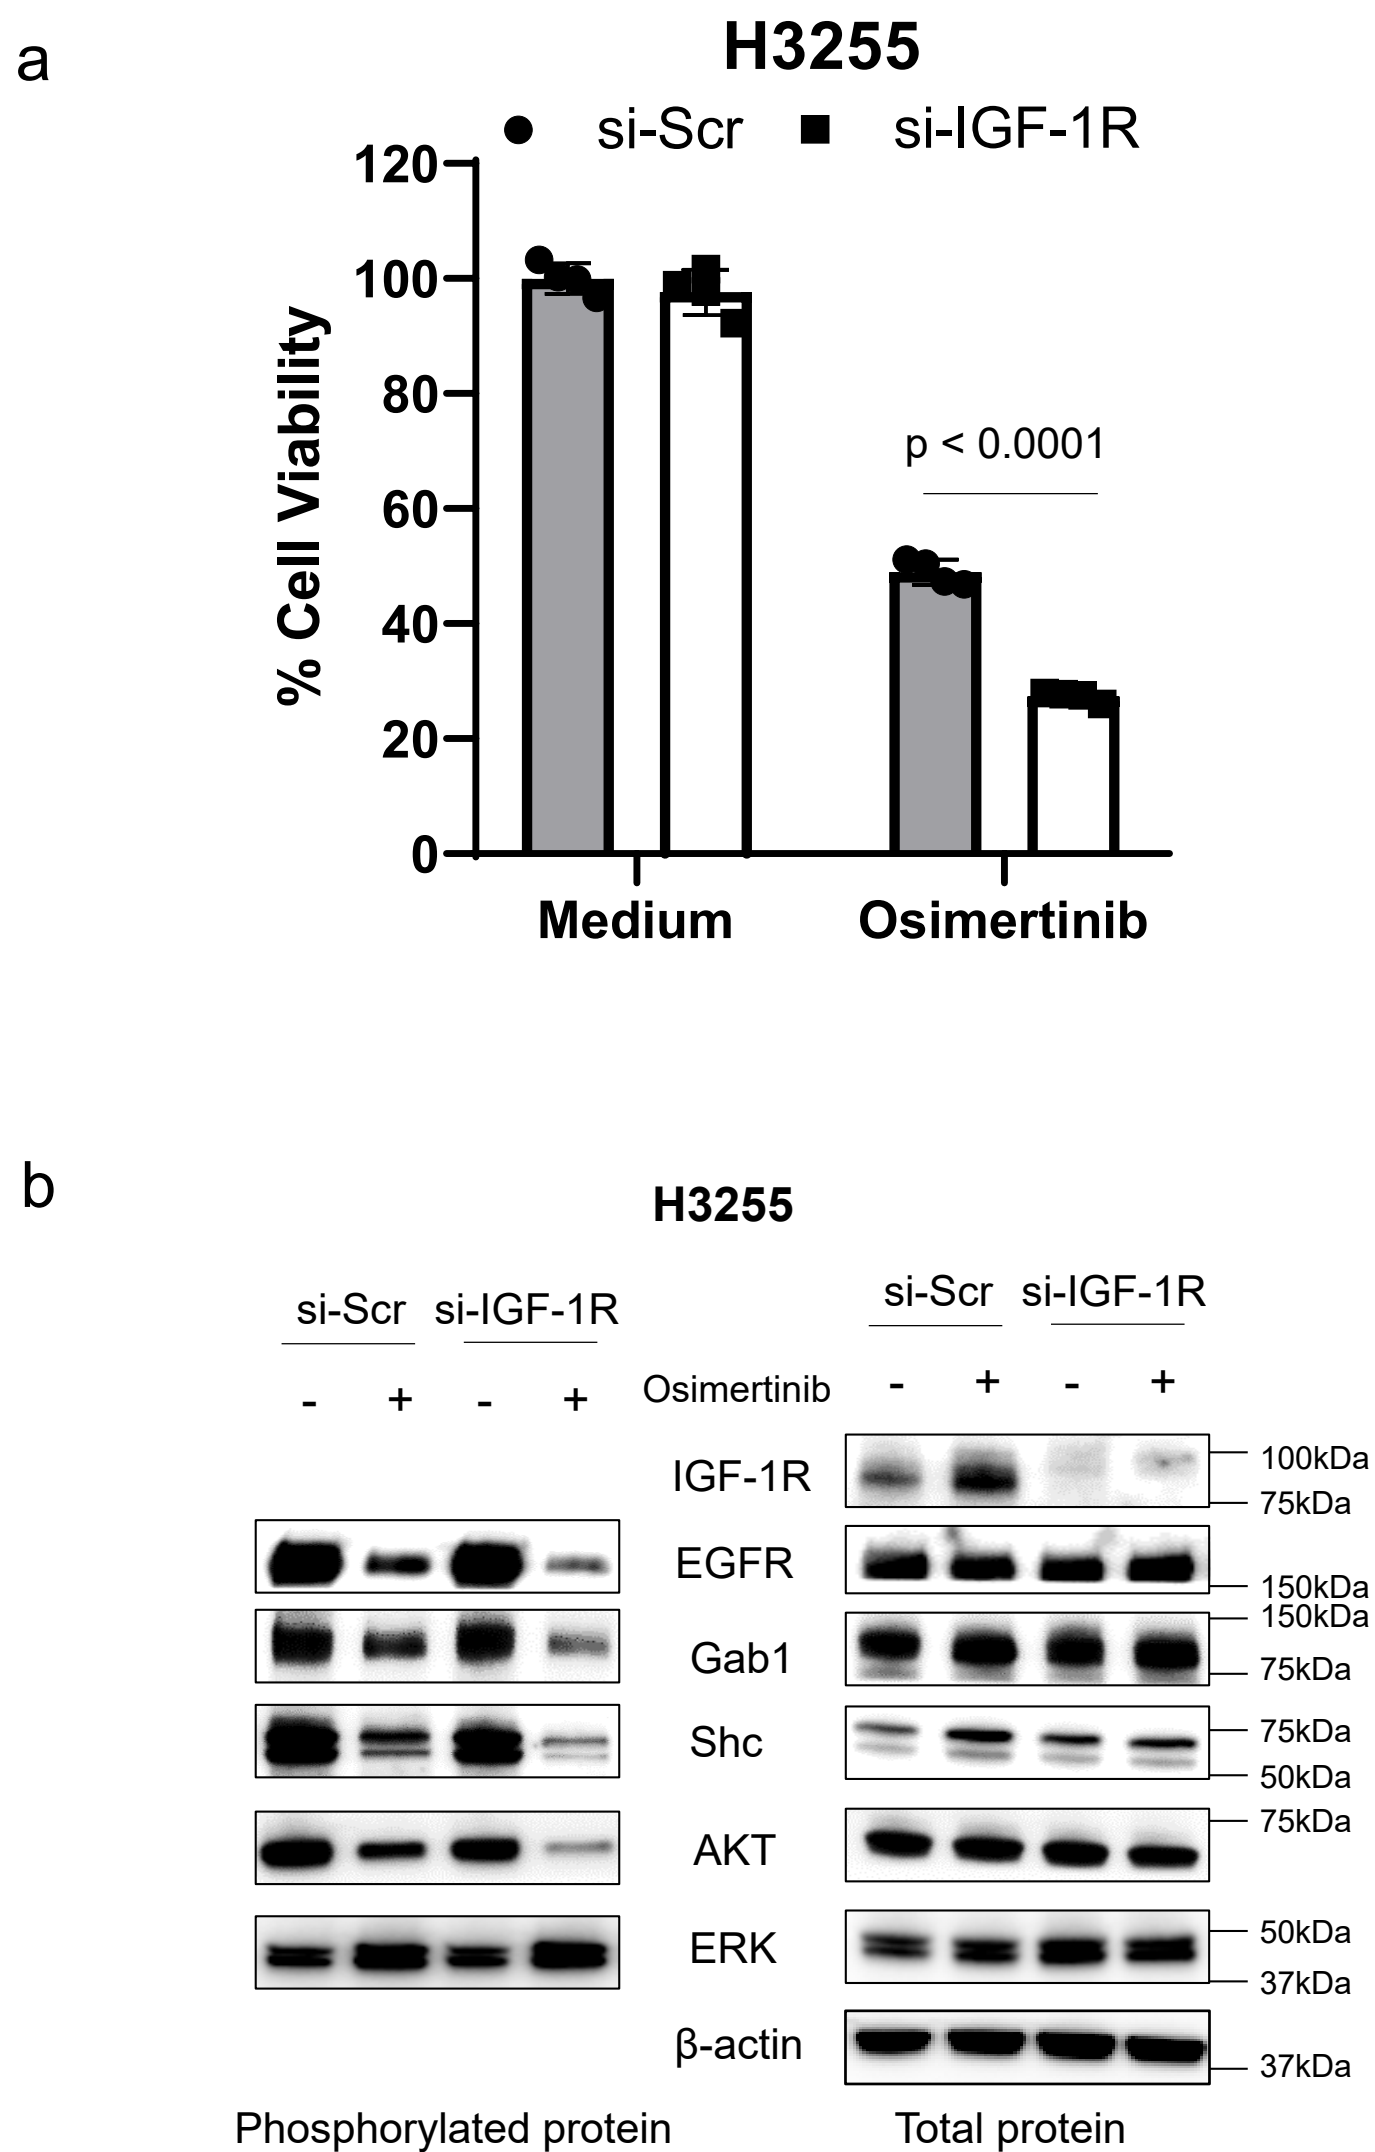

**Supplementary Figure 5. Knockdown of IGF-1R decreases the viability of H3255 cells.** **a** H3255 cells were treated with si-Scr or si-IGF-1R for 72 h in the presence or absence of osimertinib (30 nmol/L), and cell viability was determined. The percentage of growth is shown relative to untreated controls. Each sample was assayed in triplicate, with each experiment repeated at least three times independently. *p* value is provided (one-way ANOVA). Data are represented as mean  $\pm$  s.d. Bars showed s.d. **b** si-Scr or IGF-1R-specific siRNA was introduced into H3255 cells. After 24 h, the cells were incubated with or without osimertinib (30 nmol/L) for 72 h and lysed, and the indicated proteins were detected by western blotting. Data shown are representative of three independent experiments.

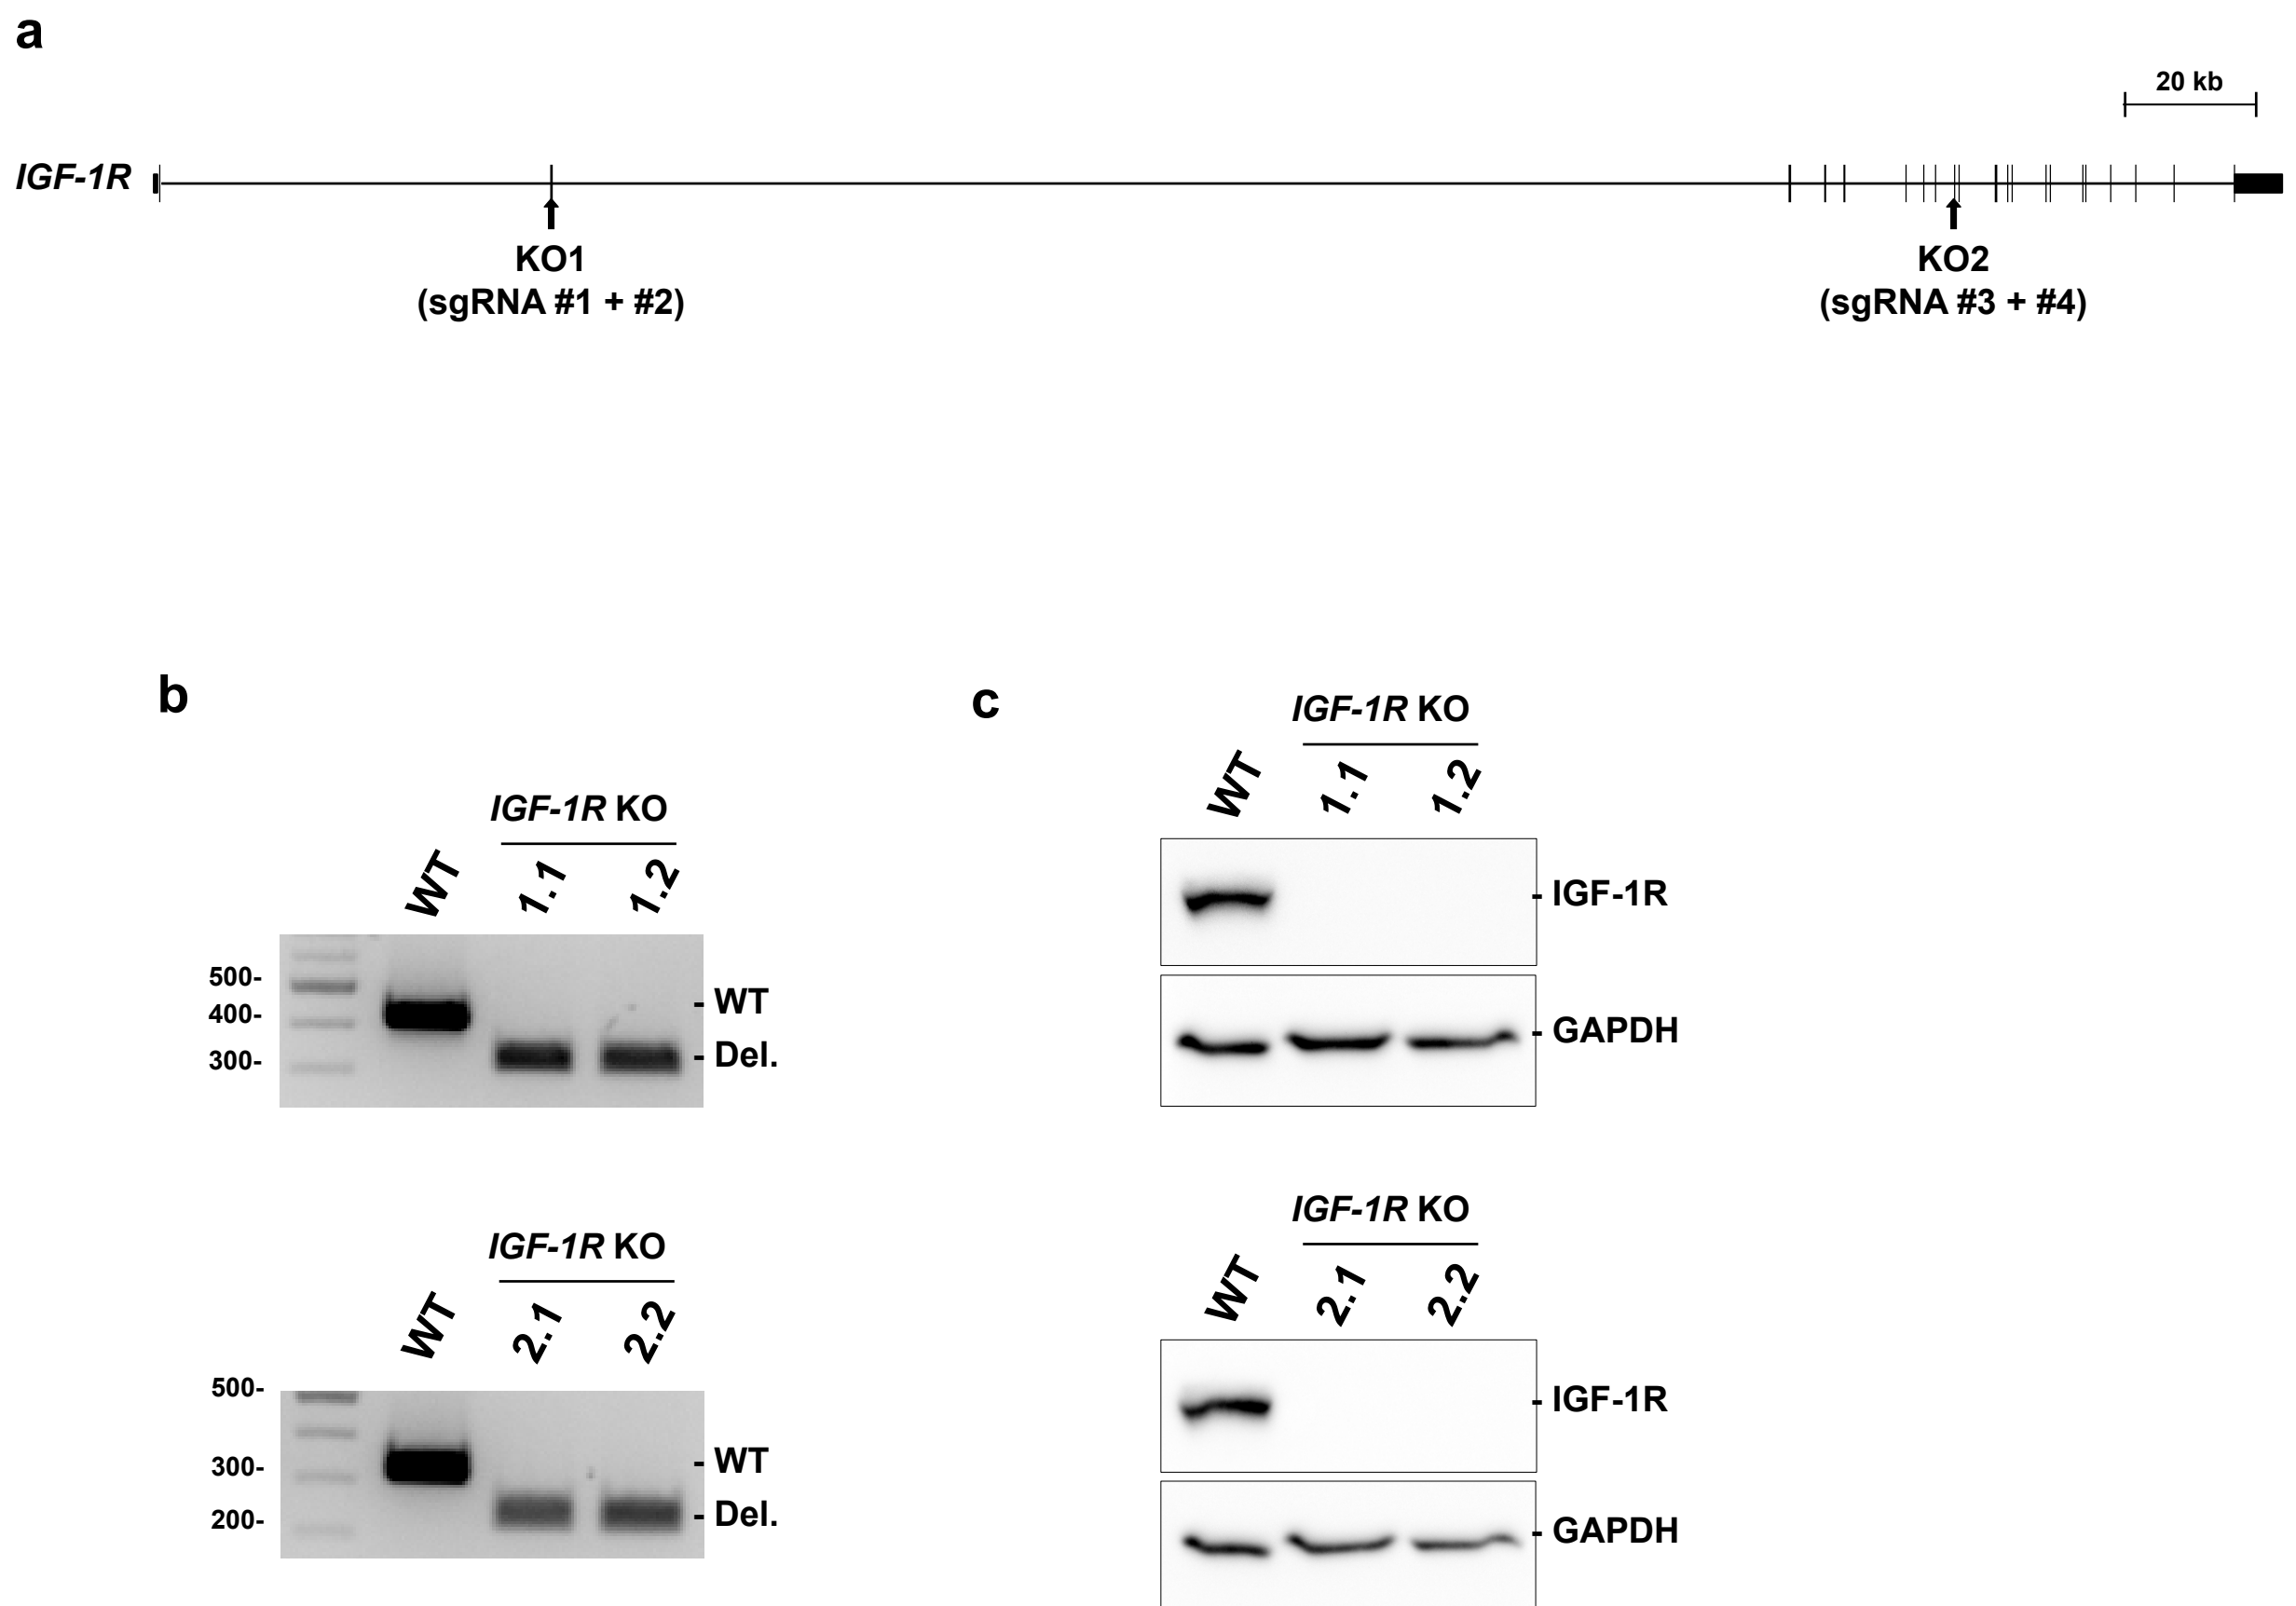

**Supplementary Figure 6. Generation of *IGF1R* knockout HCC827 cells.** **a** The location of DNA sequences corresponding to the *IGF1R*-specific sgRNAs for creating two kinds of knockout cells, KO1 and KO2. Co-expression of sgRNA #1 and #2 can partially delete exon 2 in *IGF-1R* locus, whereas co-expression of sgRNA #3 and #4 can partially delete exon 9. **b** PCR analysis with genomic DNAs from wild-type (WT) HCC827, two independent clones of KO1 (1.1 and 1.2) and KO2 (2.1 and 2.2) *IGF-1R*-knockout cells. Note that homologous deletion was observed in both KO1 and KO2 cells. **c** Western blotting of WT HCC827 and *IGF-1R*-knockout cell clones with anti-IGF-1R antibody. GAPDH was used as a loading control. Data shown are representative of three independent experiments.

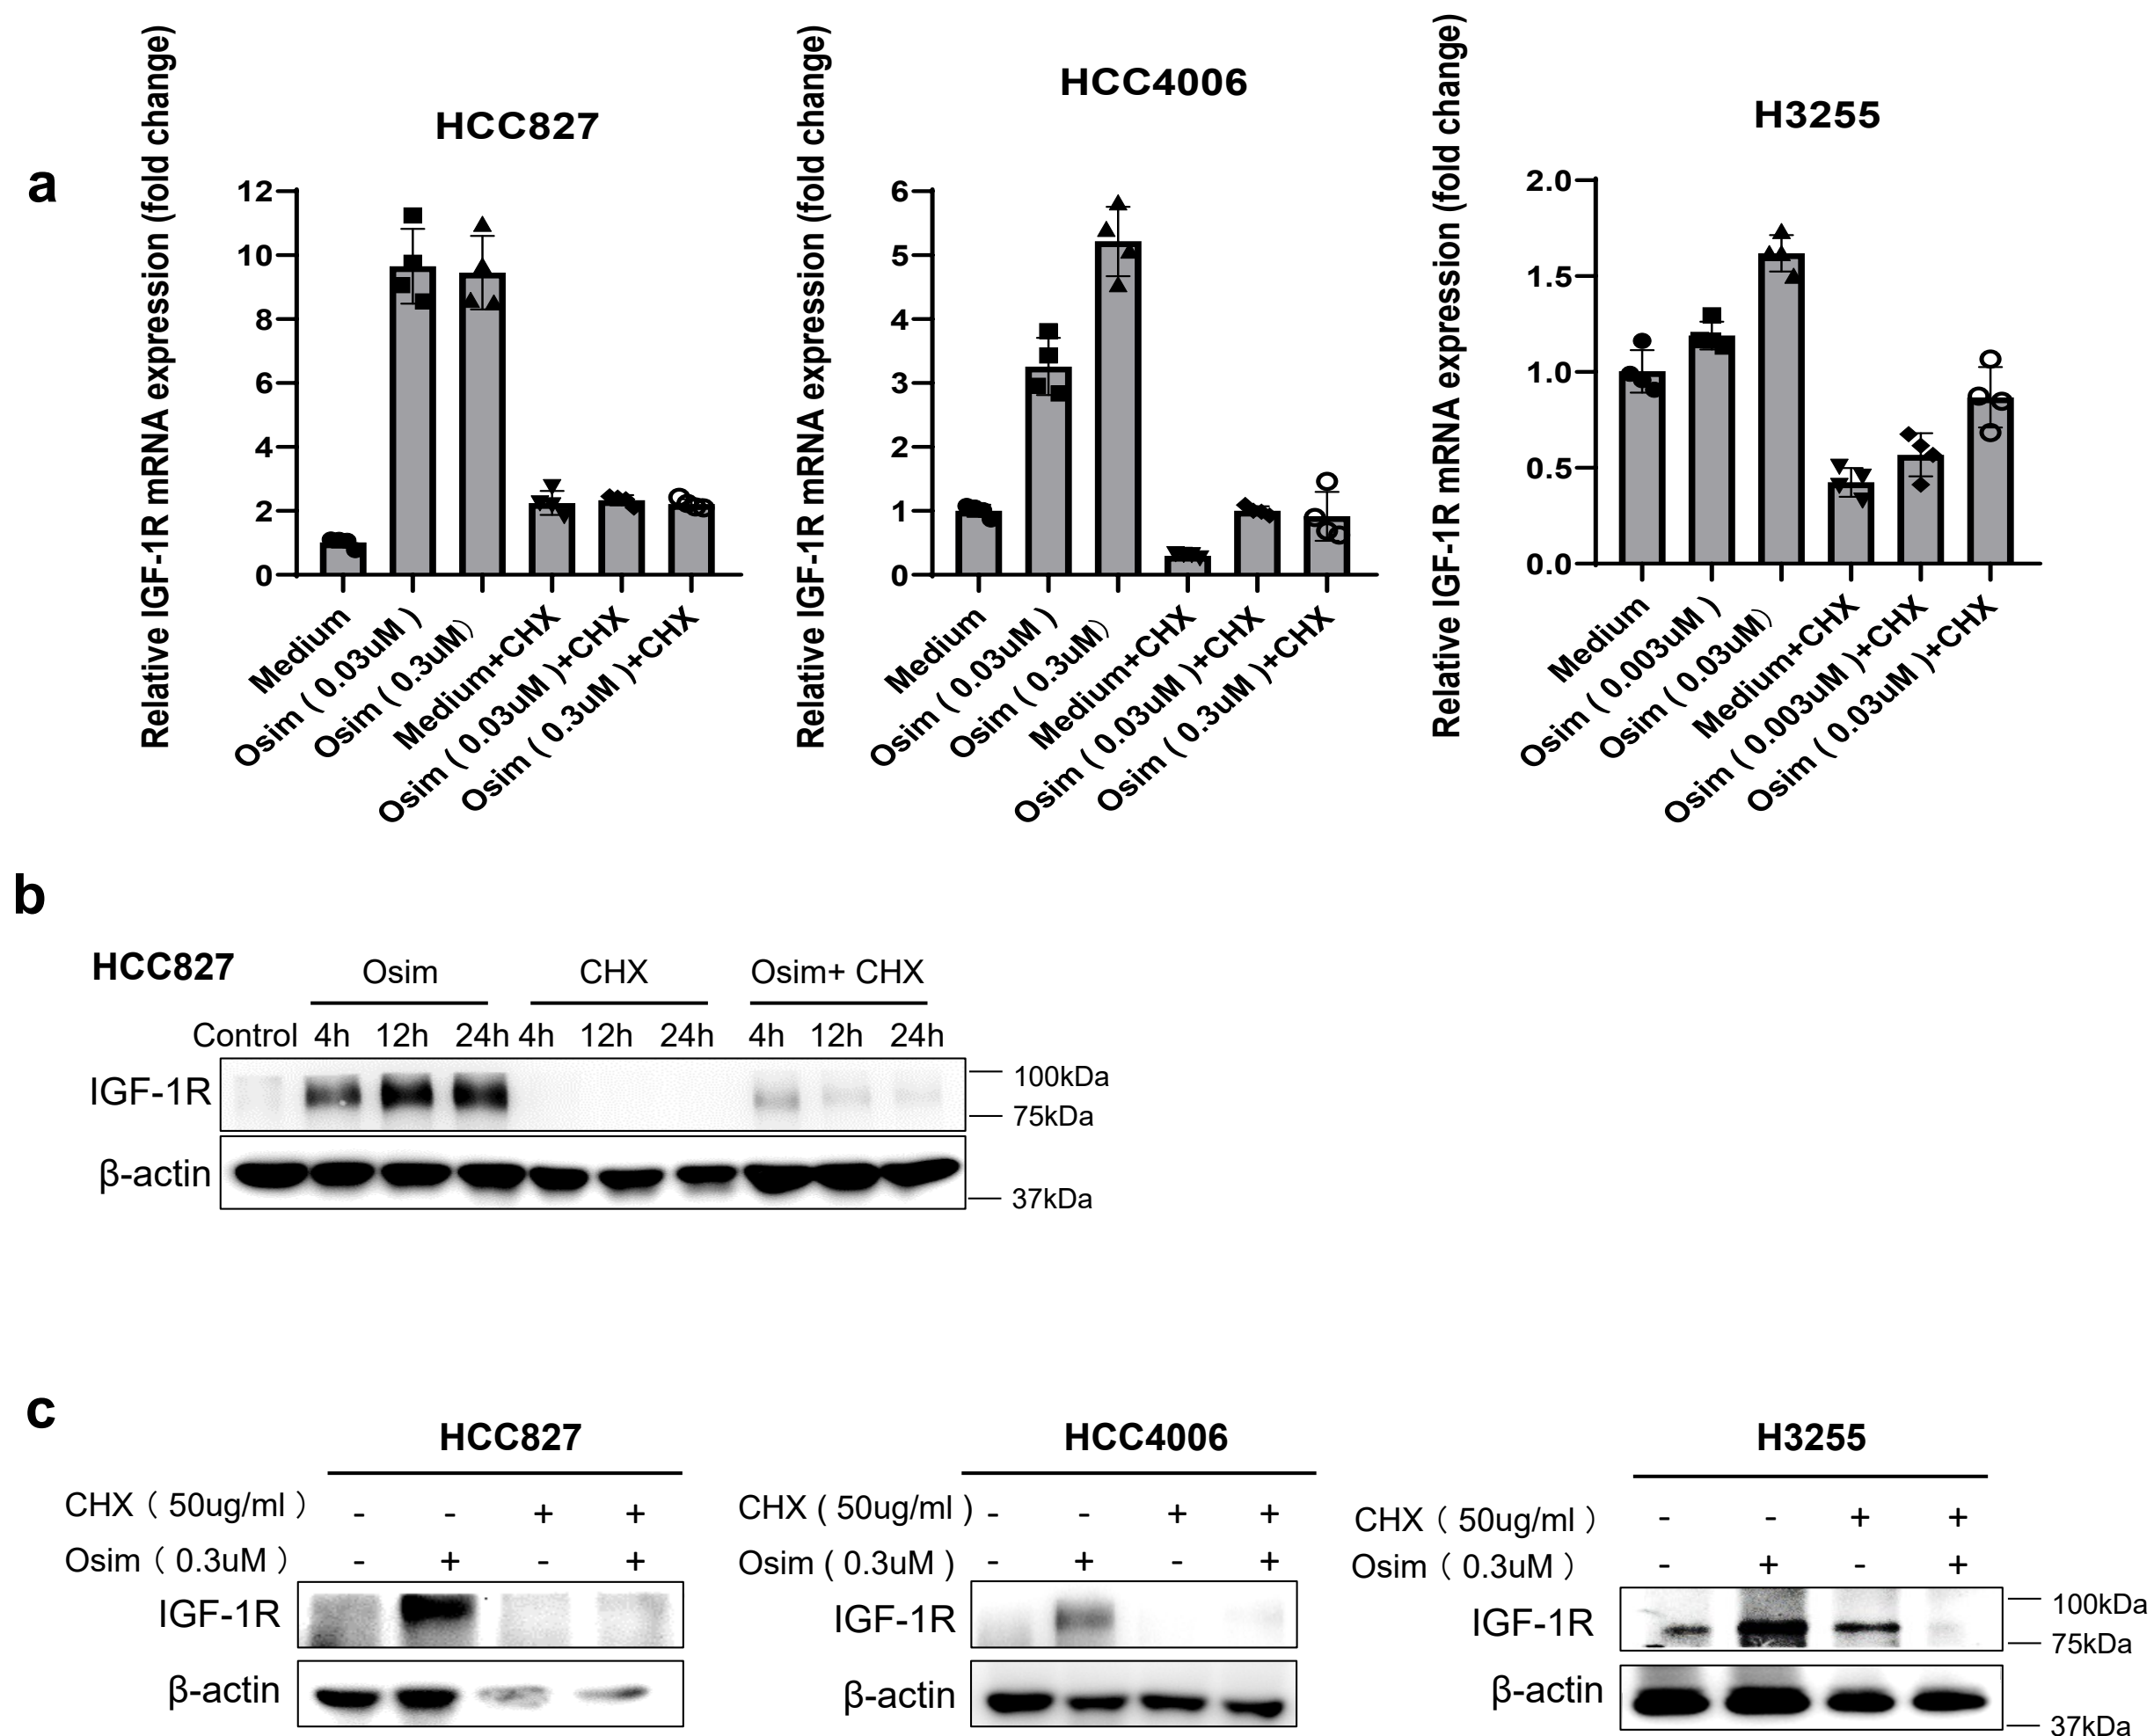

**Supplementary Figure 7. Effect of CHX on IGF-1R expression.** **a** Tumor cells were treated with osimertinib and or cycloheximide (CHX) (50 mg/ml) for 24 h. The mRNA was harvested and the IGF-1R mRNA expression was evaluated by qRT-PCR. Data are represented as mean  $\pm$  s.d. Bars showed s.d. Each sample was assayed in triplicate, with each experiment repeated at least three times independently. **b** HCC827 cells were treated with osimertinib (0.3 mmol/L) and or CHX (50 mg/ml) for indicated periods. Then, lysates were harvested and assessed by western blot. **c** Tumor cells were treated with osimertinib (0.3 mmol/L) and or CHX (50 mg/ml) for 24 h. Next, lysates were harvested and assessed by western blotting. Data shown are representative of three independent experiments.

# Supplementary Figure 8

**a**

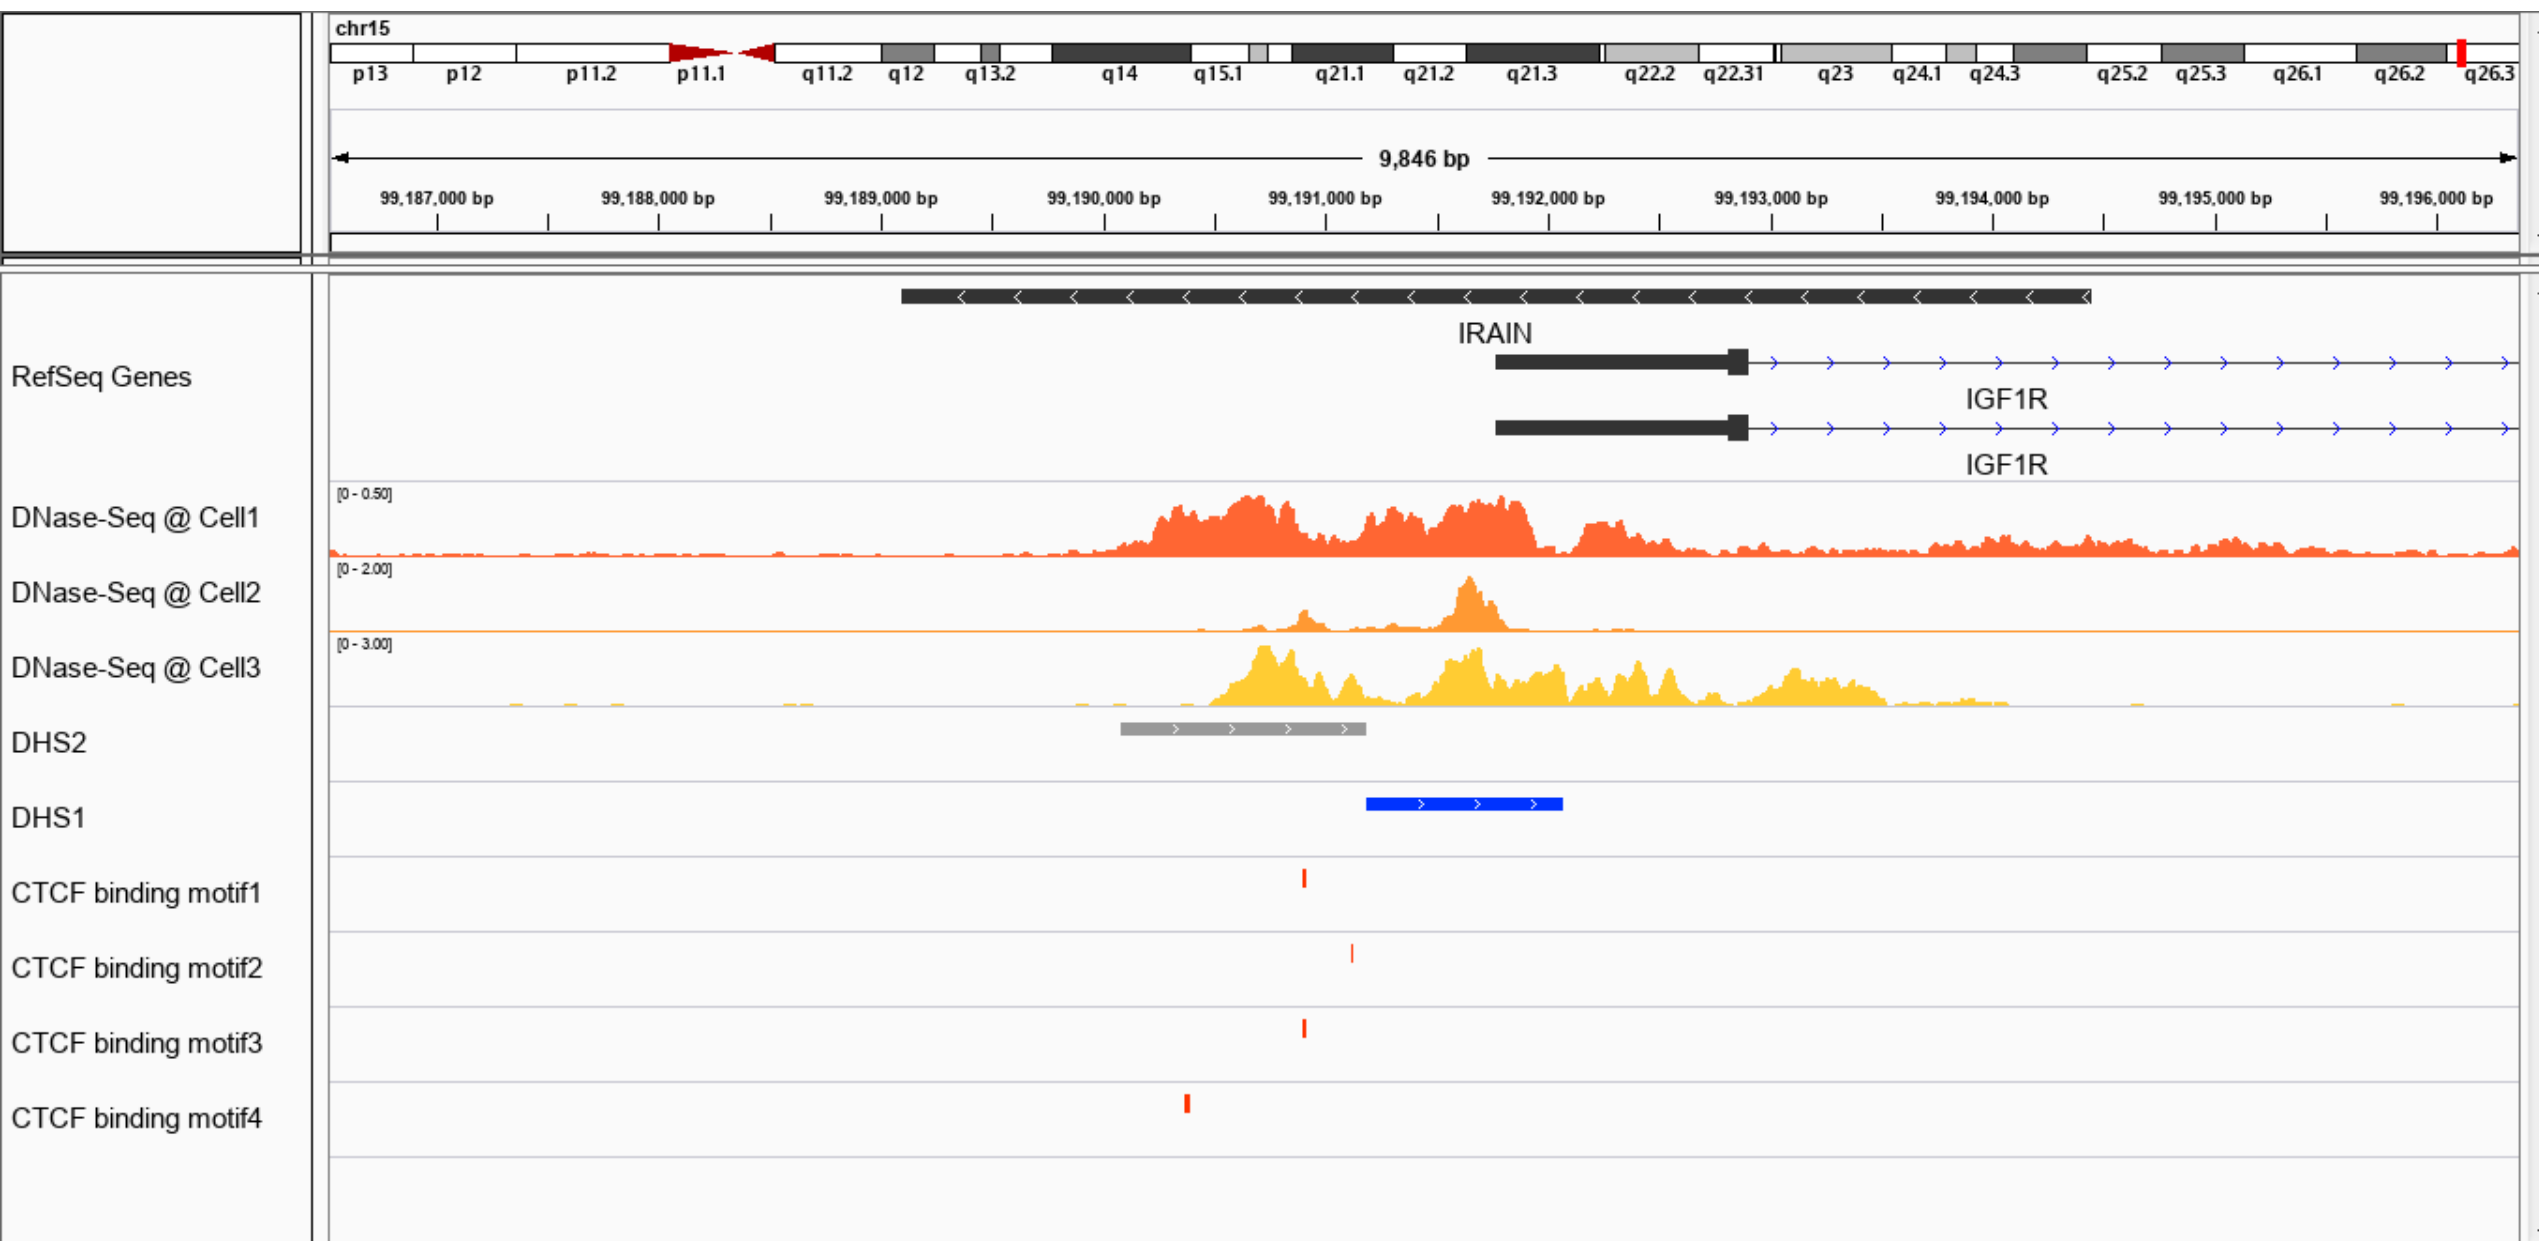

**b**

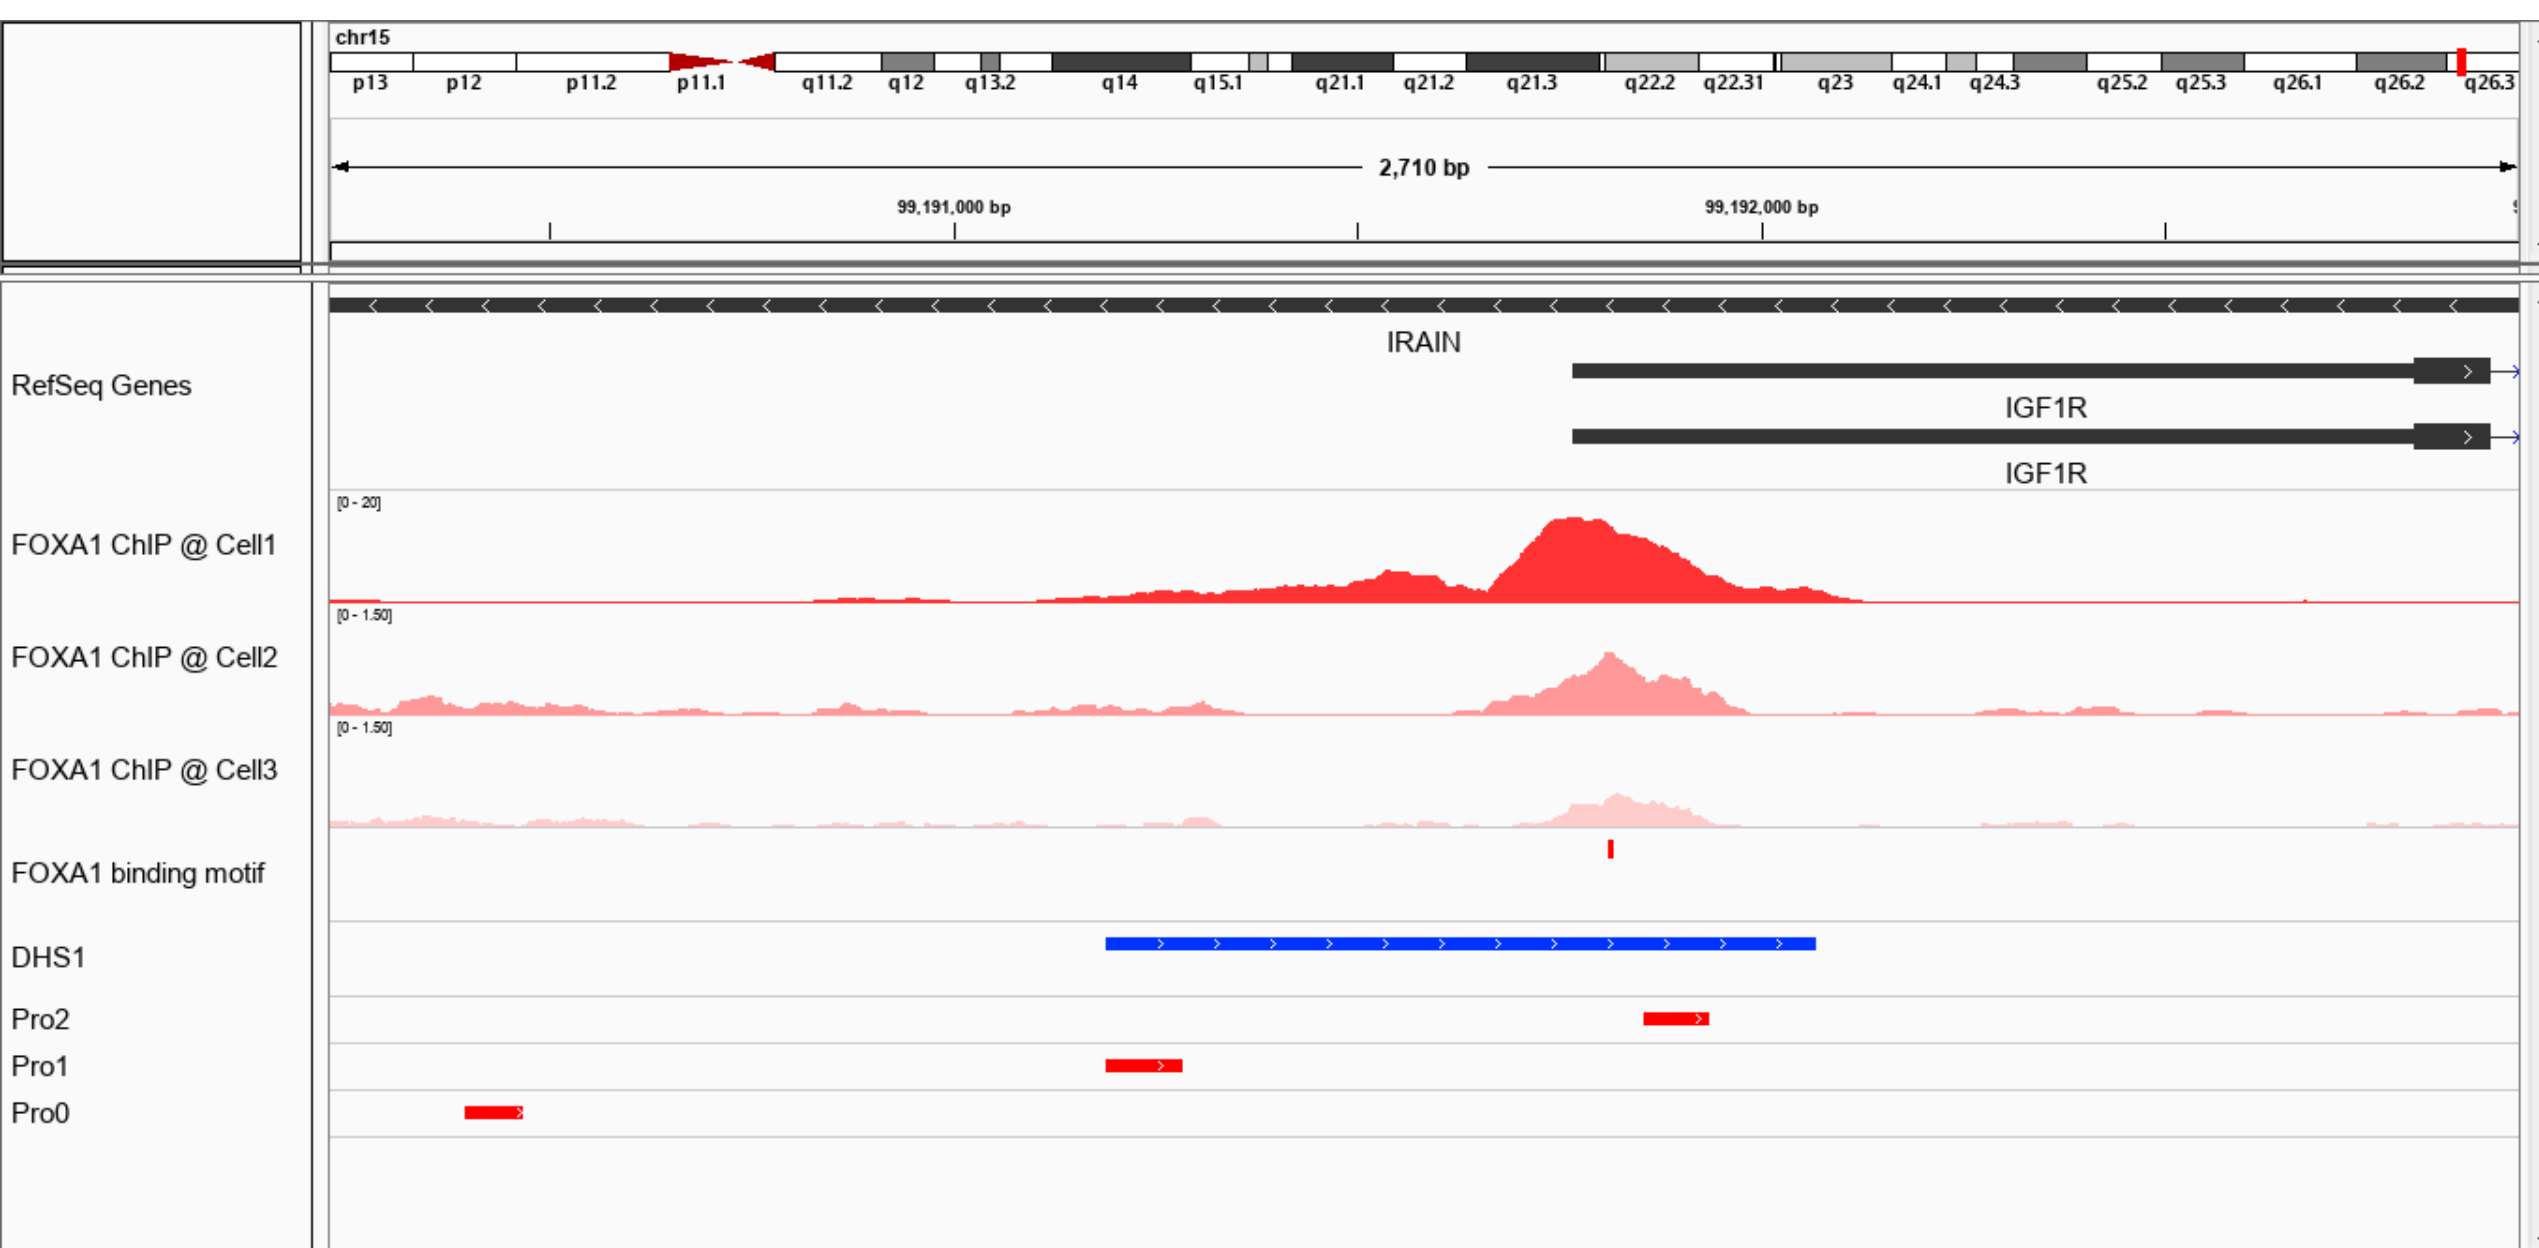

**Supplementary Figure 8. The binding motif of the FOXA1 transcription factor is located within the DNase I hypersensitivity sites (DHS) region in the IGF-1R gene. a** Visualization of DNase sensitive peaks, predicted DHSs, and CTCF binding motifs around IGF-1R TSS. We first visualized public DNase1 sensitive peaks by ChIP-Atlas (Oki et al., 2018) and then defined DNase sensitive peaks enriched regions as DHS1 (blue bar) and DHS2 (grey bar). Representative three DNase sensitive peaks are shown in orange. Four CTCF insulator binding motifs were shown with red boxes. **b** Visualization of three FOXA1 ChIP-seq peaks (red peaks), FOXA1 binding motif (small red bar), DHS1 (blue bar) and ChIP-qPCR amplified regions (red bars) around IGF-1R TSS.



**a** *EGFR* mutated NSCLC cells produced low level of IGF-1 and IGF-2

| Cell line | IGF-1 (ng/ml) | IGF-2 (ng/ml) |
|-----------|---------------|---------------|
| HCC4006   | 0.23          | 1.29          |
| HCC827    | 0.27          | 0.05          |
| H3255     | 0.27          | 0.57          |
| PC-9      | 0.52          | 0.42          |
| PC-9/GXR  | 0.86          | 0.37          |
| HCC4011   | 0.68          | 0.26          |

**b** Exogenously added IGF-1 activated IGF-1R in *EGFR* mutated NSCLC cells

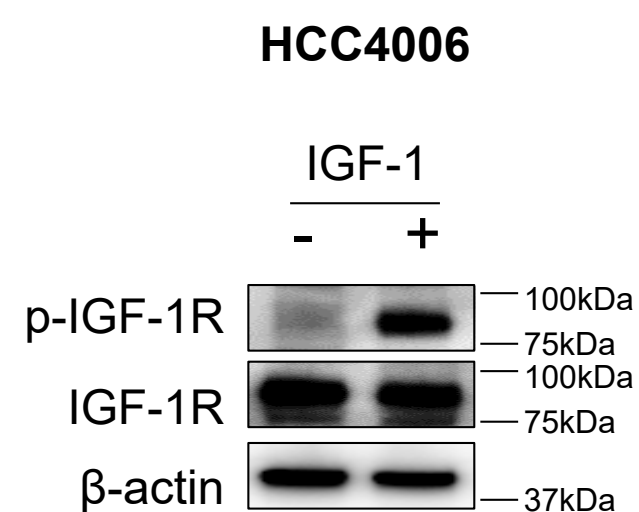

**c** Exogenously added IGF-1 did not affect osimertinib sensitivity of *EGFR* mutated NSCLC cell lines

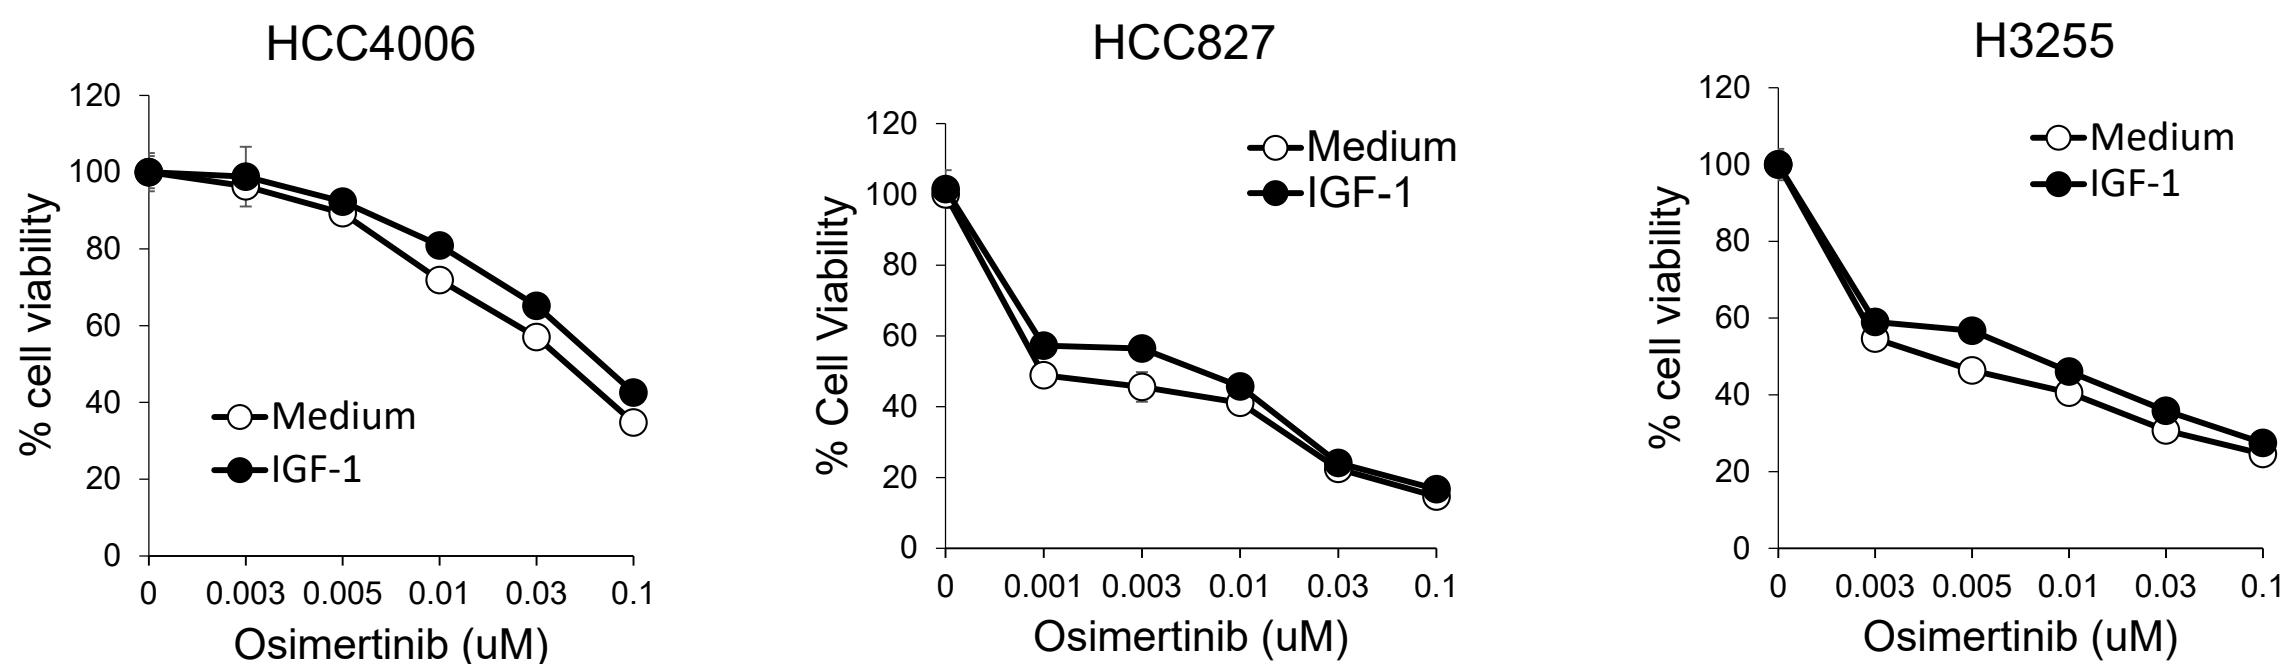

**Supplementary Figure 9. IGF-1R ligand expression by *EGFR* mutated NSCLC cell lines.** **a** *EGFR* mutated NSCLC cells ( $10^5$  cells/2 ml in a 6-well plate) were incubated for 48 h and culture supernatants were harvested. The level of IGF-1 in the supernatants was determined by ELISA. **b** HCC4006 cells were incubated with or without recombinant human IGF-1 (100 ng/ml). Then, the lysates were harvested and evaluated by western blotting. Data shown are representative of three independent experiments. **c** HCC4006, HCC827, and H3255 cells were incubated with various concentrations of osimertinib for 72 h, in the presence or absence of recombinant human IGF-1 (100 ng/ml) and cell viability was determined. The percentage of growth is shown relative to untreated controls. Data are represented as mean  $\pm$  s.d. Bars showed s.d. Each sample was assayed in triplicate, with each experiment repeated at least three times independently.

**a** AXL - low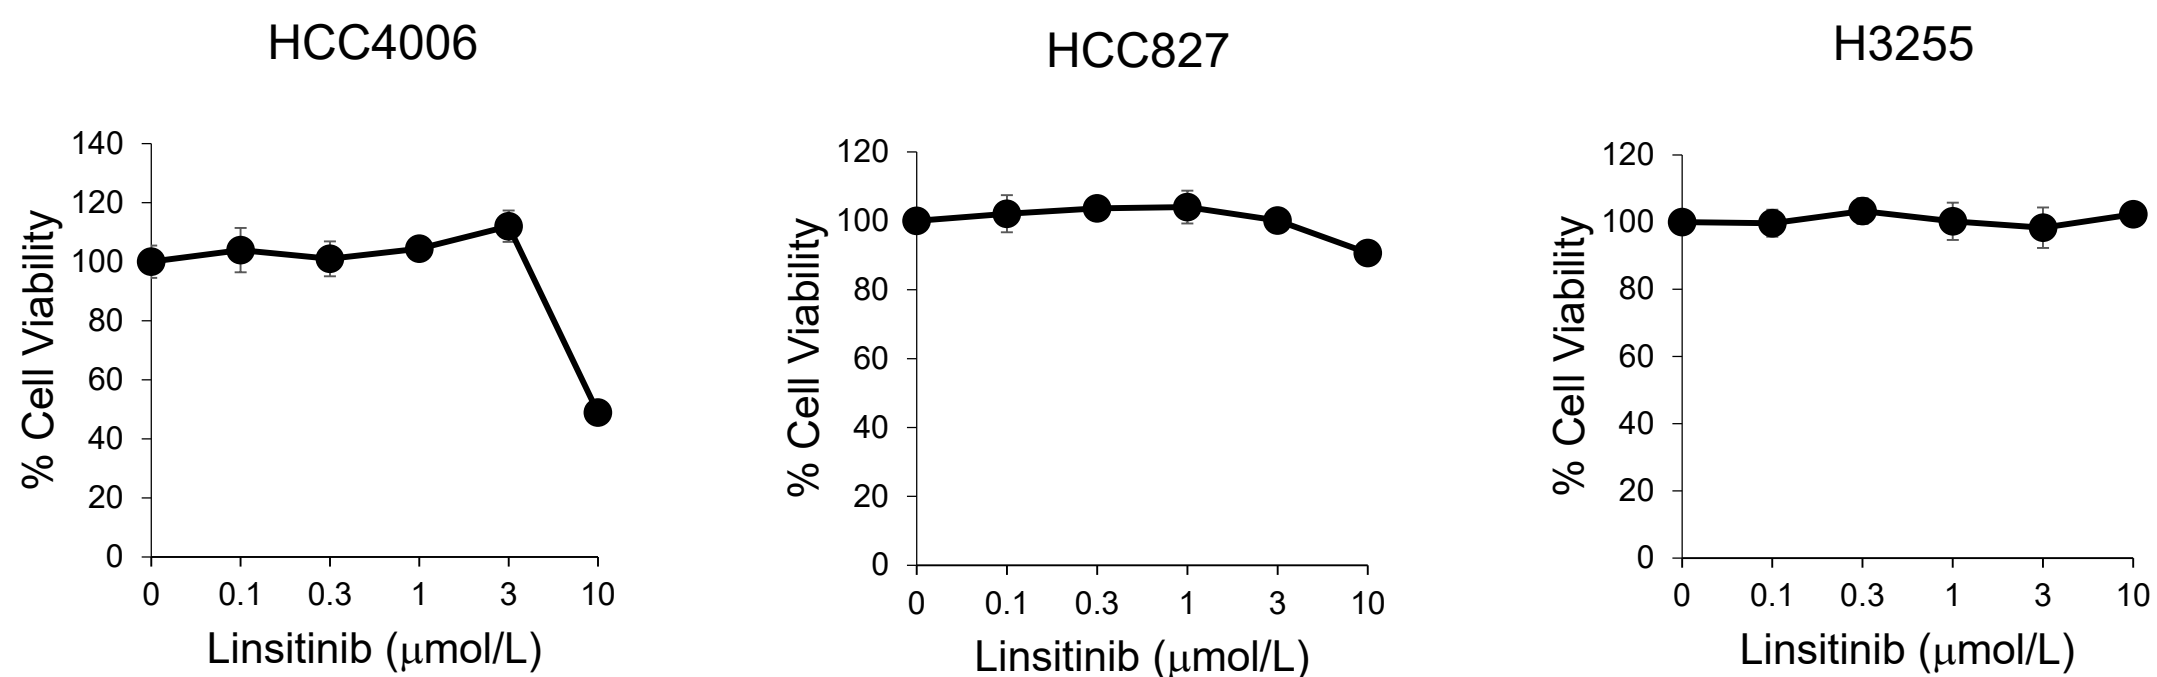**b** AXL - high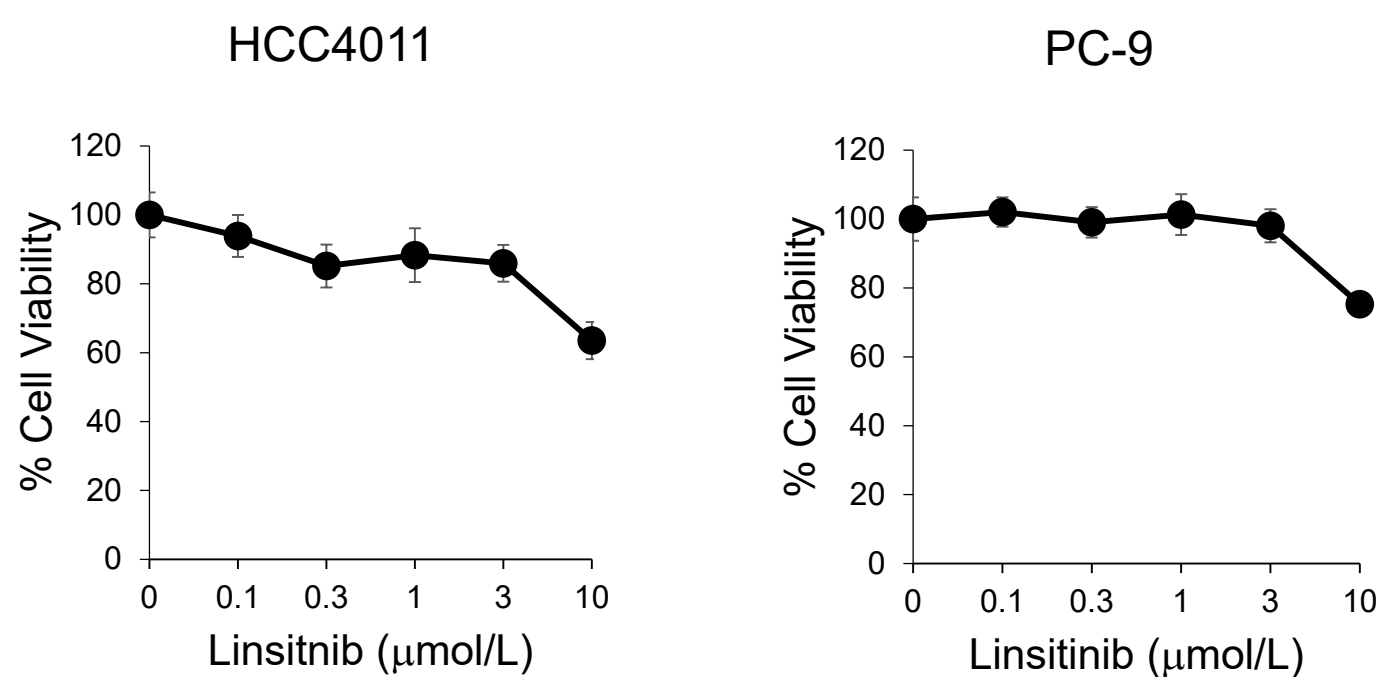

**Supplementary Figure 10. Linsitinib does not affect the viability of *EGFR* mutated NSCLC cell lines.** AXL-low expressing (**a**) and AXL-high expressing (**b**) *EGFR* mutated NSCLC cell lines were treated with various concentrations of linsitinib for 72 h, and cell viability was determined. The percentage of growth is shown relative to untreated controls. Data are represented as mean  $\pm$  s.d. Bars showed s.d. Each sample was assayed in triplicate, with each experiment repeated at least three times independently.

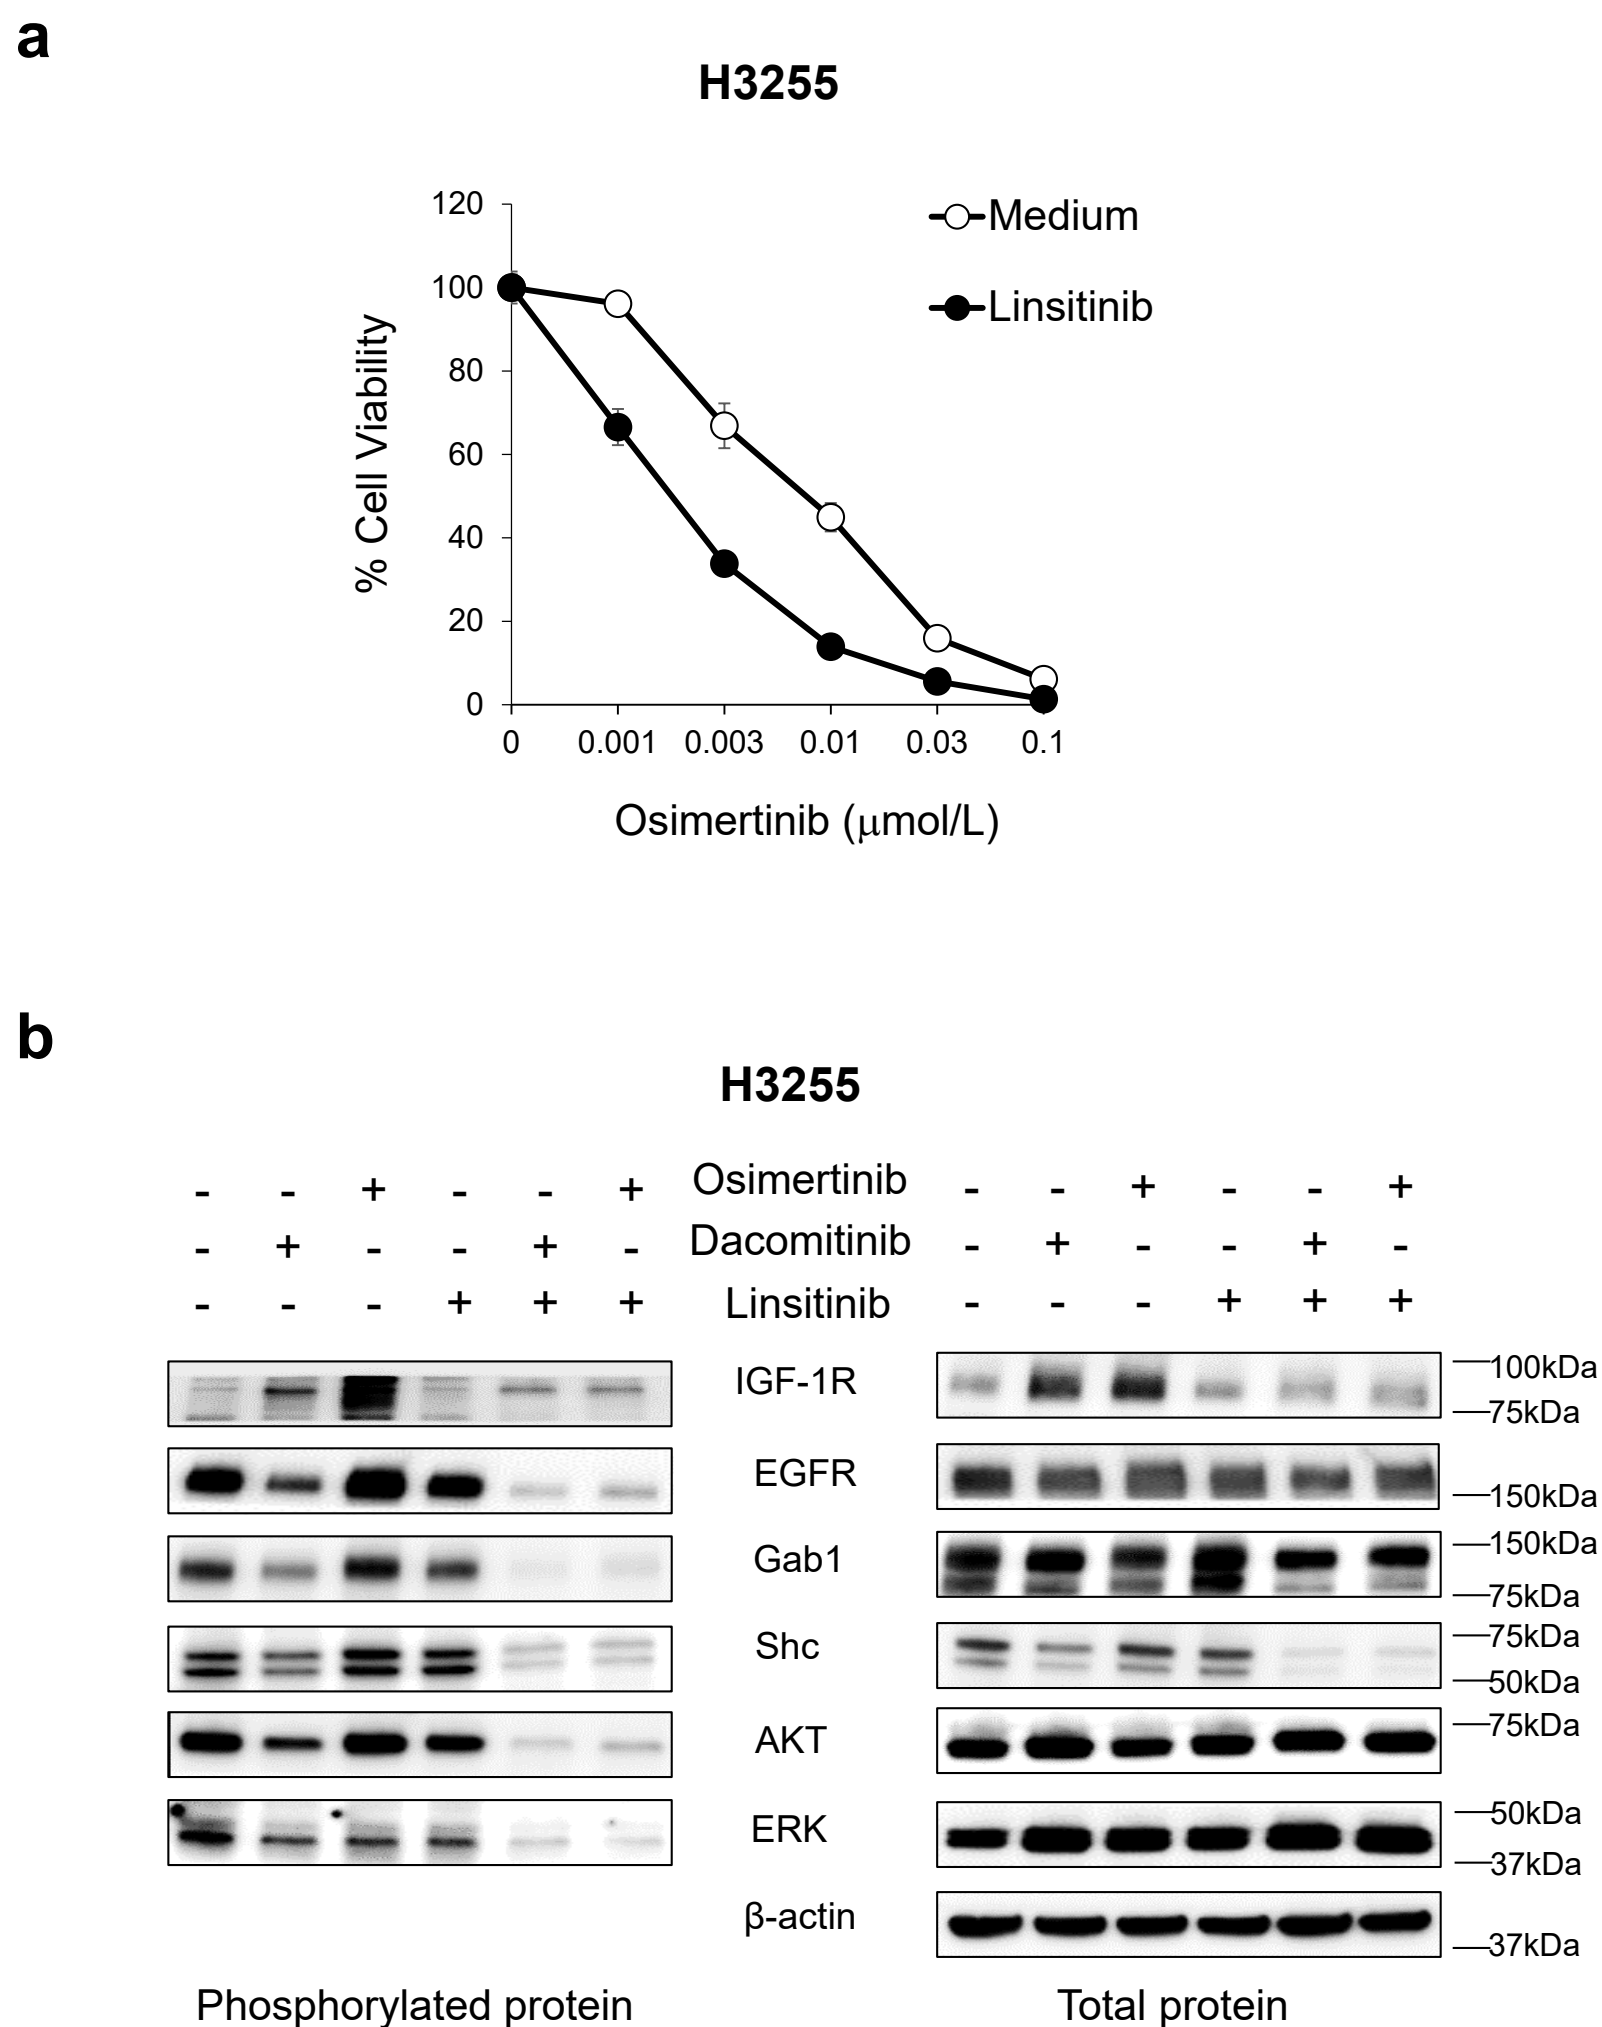

**Supplementary Figure 11. Linsitinib inhibits the viability of H3255 cells exposed to osimertinib.** **a** H3255 cells were treated with various concentrations of osimertinib for 72 h in the presence or absence of linsitinib (1 μmol/L), and cell viability was determined. The percentage of growth is shown relative to untreated controls. Data are represented as mean ± s.d. Bars showed s.d. Each sample was assayed in triplicate, with each experiment repeated at least three times independently. **b** H3255 cells were treated with osimertinib (30 nmol/L), dacomitinib (3 nmol/L), and or linsitinib (1 μmol/L). After 72 h, the cells were lysed, and the indicated proteins were detected by western blotting. Data shown are representative of three independent experiments.

AXL- low

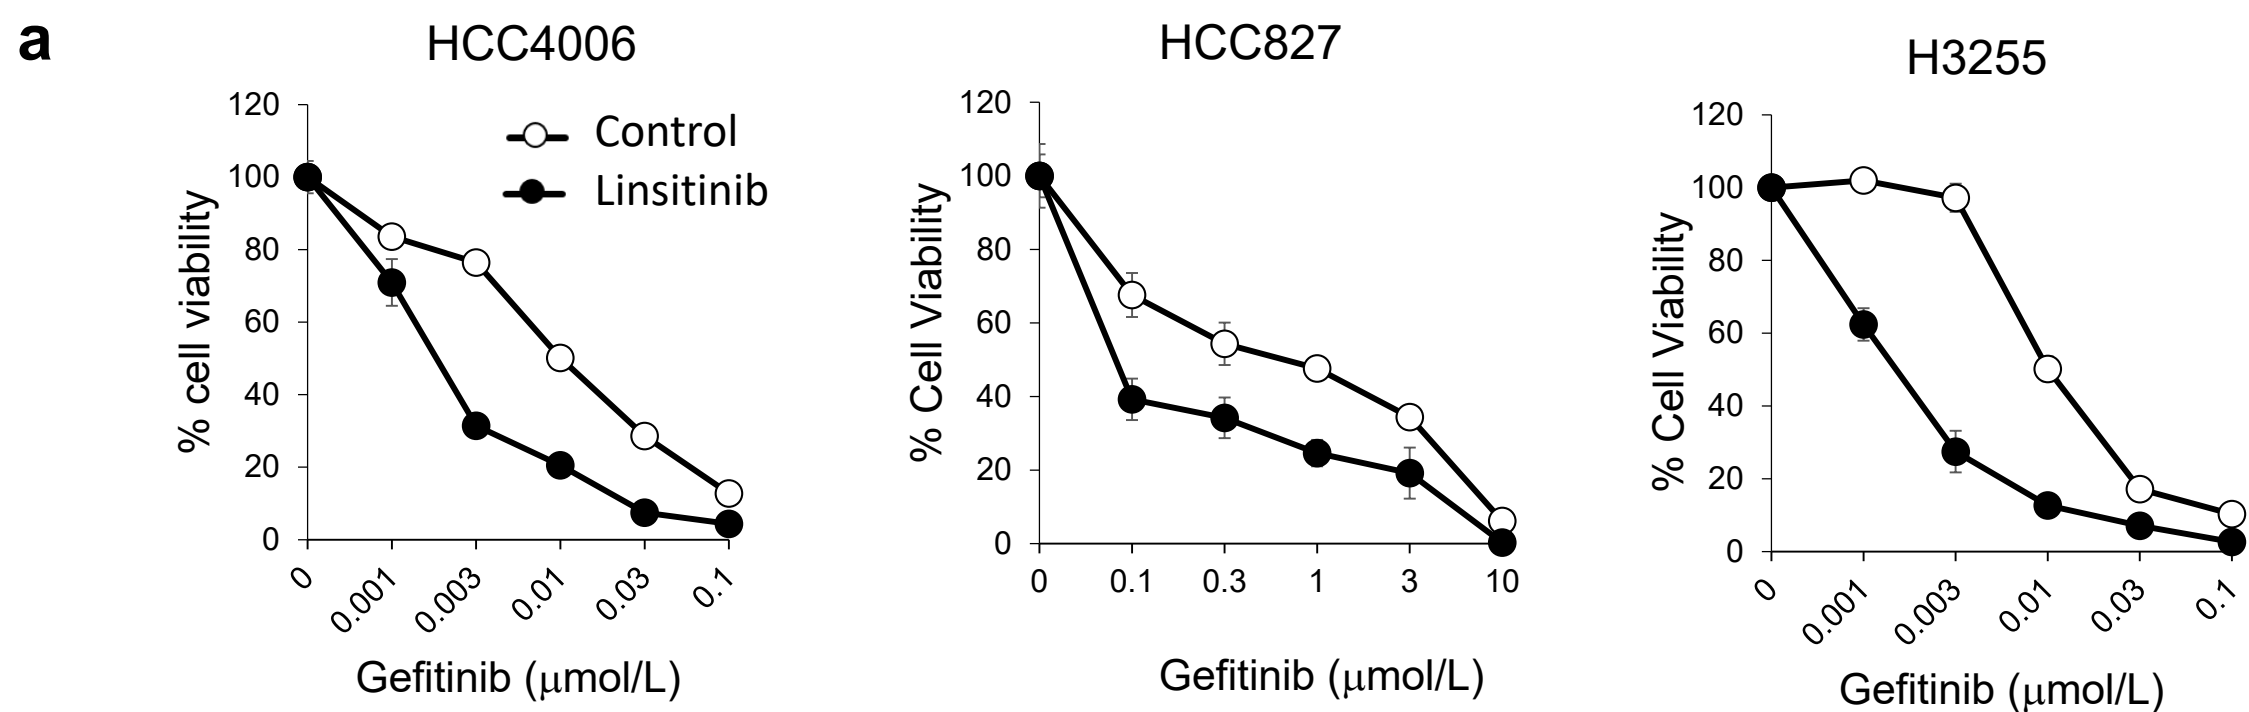

AXL- high

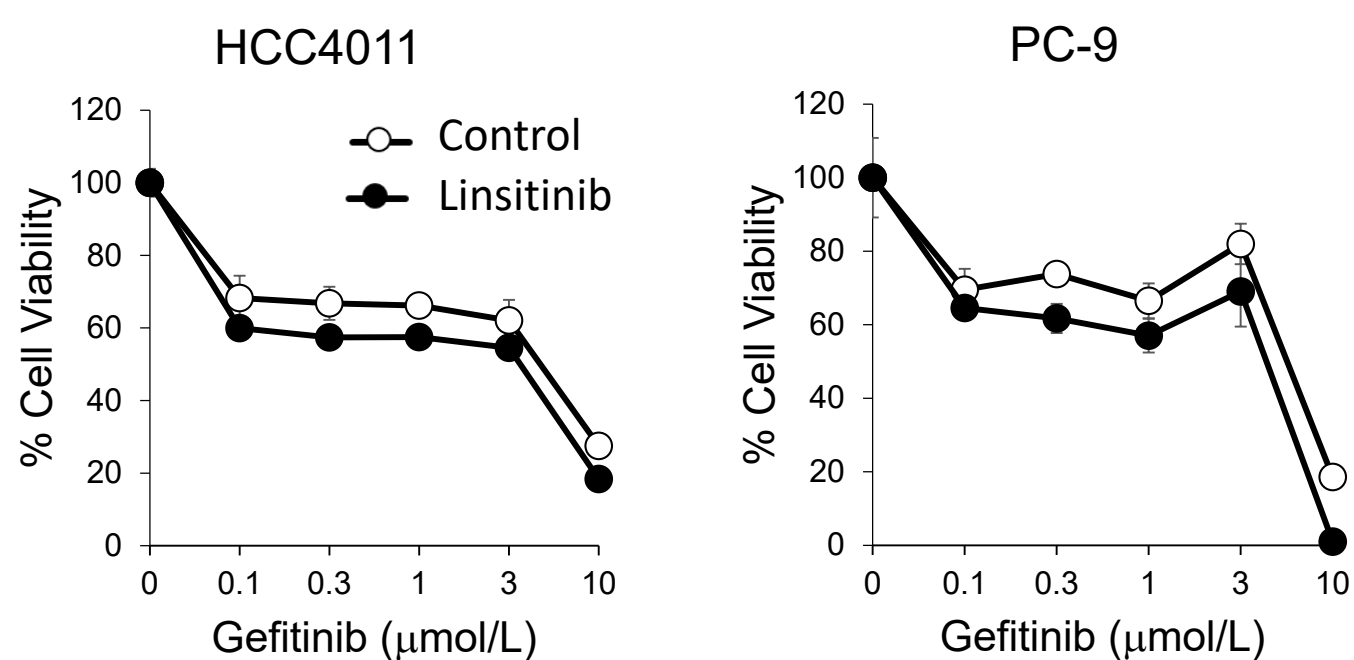**b**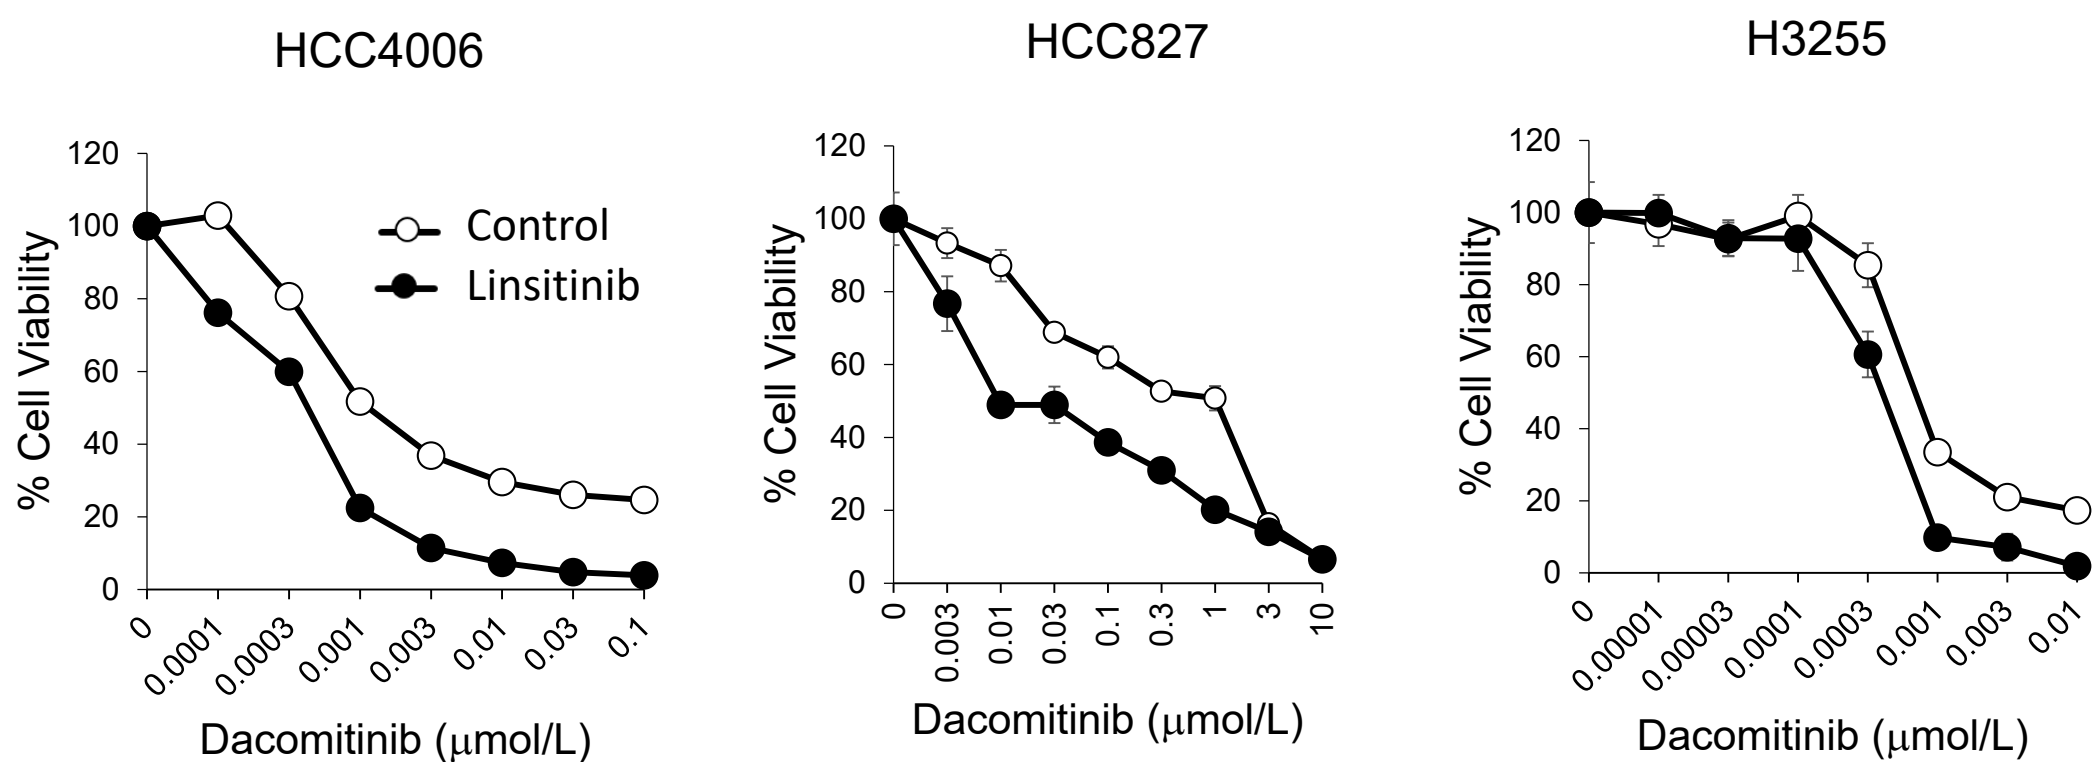

**Supplementary Figure 12. Linsitinib inhibits the viability of AXL-low expressing *EGFR* mutated NSCLC cell lines exposed to gefitinib or dacomitinib.** *EGFR* mutated NSCLC cell lines were treated with various concentrations of gefitinib (**a**) or dacomitinib (**b**) for 72 h in the presence or absence of linsitinib (1 μmol/L), and cell viability was determined. The percentage of growth is shown relative to untreated controls. Data are represented as mean ± s.d. Bars showed s.d. Each sample was assayed in triplicate, with each experiment repeated at least three times independently.

## HCC4006

Medium      Osimertinib

Medium

Linsitinib

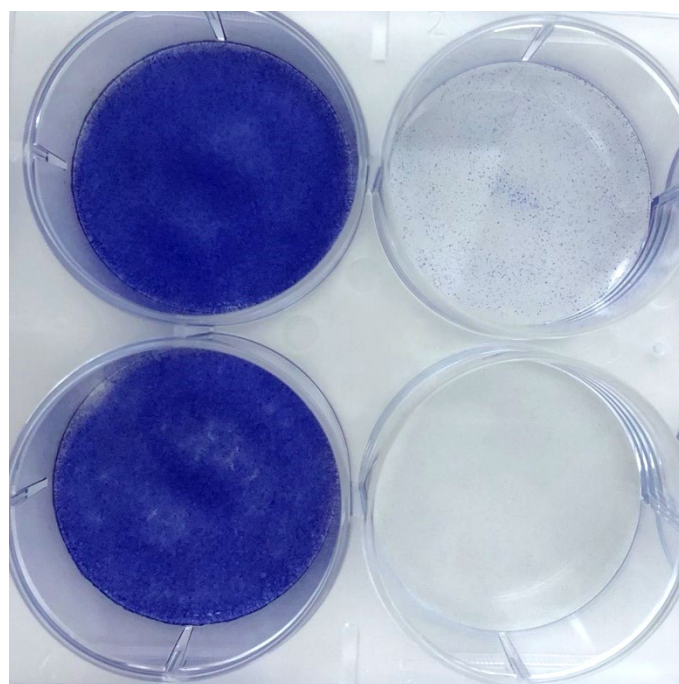

## HCC827

Medium      Osimertinib

Medium

Linsitinib

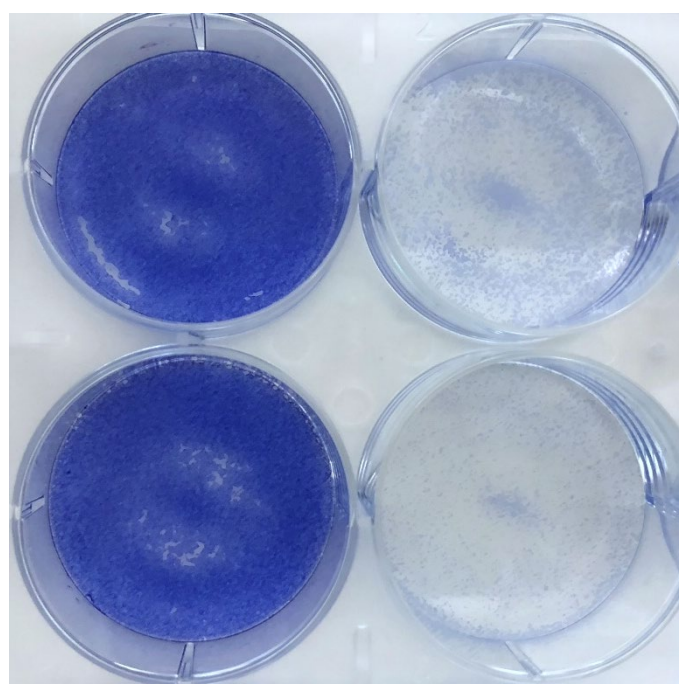

## H3255

Medium      Osimertinib

Medium

Linsitinib

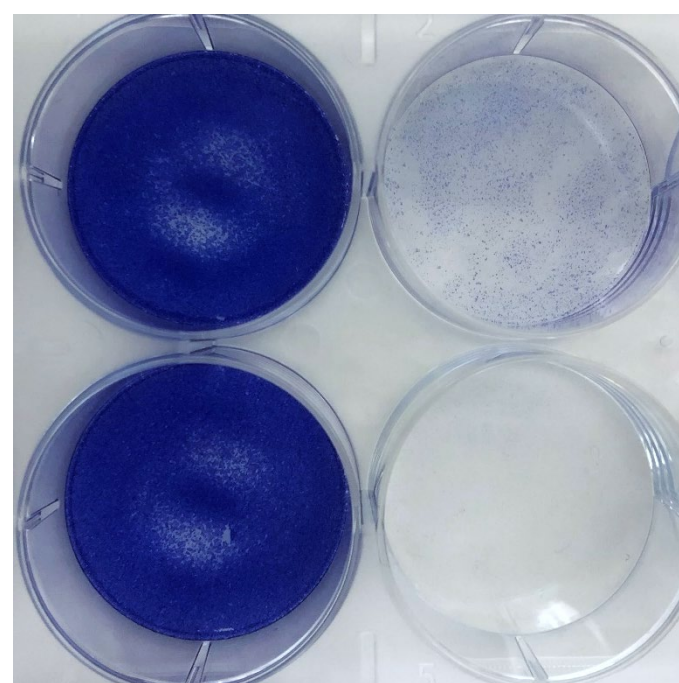

**Supplementary Figure 13. Linsitinib and osimertinib cultured for 7 days inhibit the viability of AXL-low expressing *EGFR* mutated NSCLC cell lines.** HCC4006, HCC827, and H3255 cells were cultured for 7 days in the presence or absence of linsitinib (1  $\mu\text{mol/L}$ ) and or osimertinib (500  $\text{nmol/L}$ ) in a 6-well plate. The plates were stained with crystal violet and imaged. A representative plate of three independent experiments is shown.

**a Body weight of HCC4006-inoculated mice treated with continuous combination**

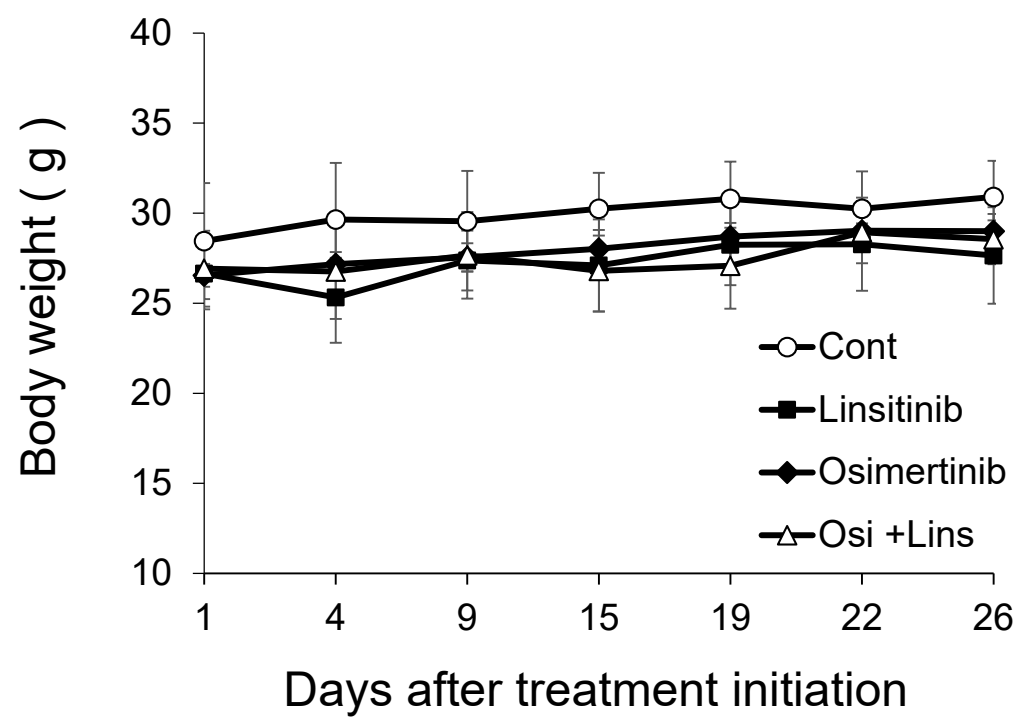

**b Body weight of HCC4006-inoculated mice treated with transient combination**

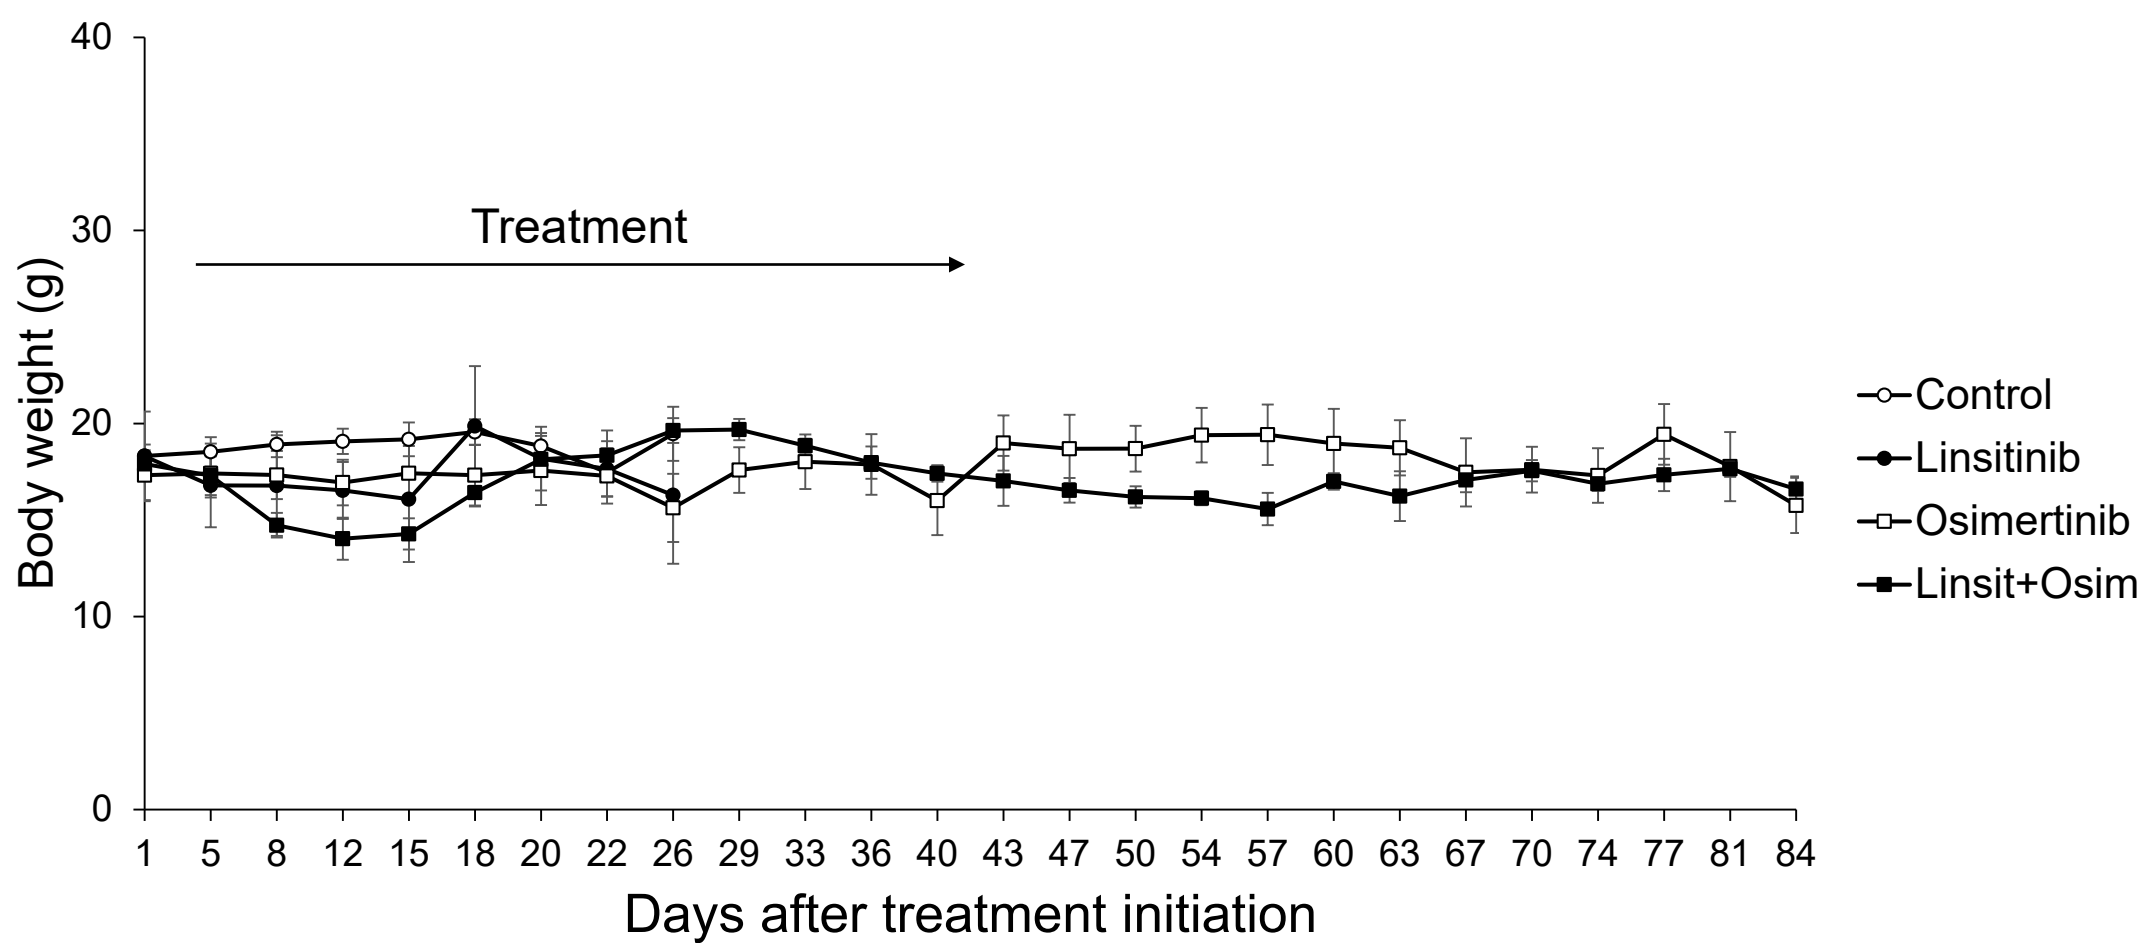

**Supplementary Figure 14. Body weight of mice.** Mice body weight is presented in Figure 6 (a) and Figure 7b (b). Data are the mean  $\pm$  s.d. of 6 mice in each group.

**Supplementary Table 1.**

List of shRNA oligos, qRT-PCT primer sets, and Chip-qPCR primer sets.

**Supplementary Table 1A; shRNA oligos**

|                |                                                            |
|----------------|------------------------------------------------------------|
| <b>shBCL6</b>  |                                                            |
| Forward        | CCGGCCACAGTGACAAACCCTACAACCTCGAGTTGTAGGGTTTGTCACTGTGGTTTTT |
| Reverse        | AATTAAAAACACAGTGACAAACCCTACAACCTCGAGTTGTAGGGTTTGTCACTGTGG  |
| <b>shCEBPA</b> |                                                            |
| Forward        | CCGGCAACTCTAGTATTTAGGATACTCGAGTATCCTAAATACTAGAGTTGCTTTTT   |
| Reverse        | AATTAAAAAGCAACTCTAGTATTTAGGATACTCGAGTATCCTAAATACTAGAGTTGC  |
| <b>shFOXA1</b> |                                                            |
| #1 Forward     | CCGGGAACACCTACATGACCATGAACTCGAGTTCATGGTCATGTAGGTGTTCTTTTTG |
| #1 Reverse     | AATTCAAAAAGAACACCTACATGACCATGAACTCGAGTTCATGGTCATGTAGGTGTTG |
| #2 Forward     | CCGGCGAAGTTTAATGATCCACAACCTCGAGTTGTGGATCATTAACTTCGCTTTTTG  |
| #2 Reverse     | AATTCAAAAAGCGAAGTTTAATGATCCACAACCTCGAGTTGTGGATCATTAACTTCGG |
| #3 Forward     | CCGGCGTACTACCAAGGTGTGTATCTCGAGATACACACCTTGGTAGTACGCTTTTTG  |
| #3 Reverse     | AATTCAAAAAGCGTACTACCAAGGTGTGTATCTCGAGATACACACCTTGGTAGTACGC |
| <b>shNFE2</b>  |                                                            |
| Forward        | CCGGCTAAGCTTTGGTCTATAAAGTCTCGAGACTTTATAGACCAAAGCTTAGTTTTTG |
| Reverse        | AATTCAAAAAGCTTTGGTCTATAAAGTCTCGAGACTTTATAGACCAAAGCTTAG     |

Supplementary Table 2B; qRT-PCR primer sets

| Gene   | Forward                   | Reverse                  |
|--------|---------------------------|--------------------------|
| AR     | CAGCCTATTGCGAGAGAGCTG     | GAAAGGATCTTGGGCACTTGC    |
| ARNT   | GGGAACCTCACTTCGTGGT       | CTGGGAGGGAAACACCTG       |
| ARNTL  | TTGCTGAGGAAATCATGGAA      | GGCGTACTCGTGATGTTCAA     |
| BACH1  | GGACACTCCTTGCCAAATGCAG    | TGACCTGGTTCTGGGCTCTCAC   |
| BCL6   | GACTCTGAAGAGCCACCTGC      | CTGGCTTTTGTGACGGAAAT     |
| BCL11B | CCCAGAGGGAGCTCATCAC       | ACTTGGCTCCTCTATCTCCAGAC  |
| BCLAF1 | GTCTGGGTCTGGTTCTGTTGG     | TTCTGTGGTGGCATTGTCTTT    |
| BCOR1  | CGATGCCTATAGCGATGTGTT     | TCCGAAAGCAGTAGCCAGTT     |
| CDK9   | TTCGGGGAGGTGTTCAAG        | ATCTCCCAGCAAGGCTGTAAT    |
| CEBPA  | TGGACAAGAACAGCAACGAGT     | TTGTCACTGGTCAGCTCCAG     |
| CHD8   | TGAACTGTTTGGGAATGGAA      | TGCTGCTCTCTGGTGCAATA     |
| CREB1  | TGCCACATTAGCCCAGGTA       | CCATTGGGCAGCTGACTAGA     |
| CREBBP | ACCGGTGTAAGGAAAGGCTG      | TCAGGTGTTGGGAAGATGGC     |
| CTCF   | GAAAGAAGATTCCTCTGACAGTGA  | TCTGGCTCAGGTTCAATTTCTAC  |
| DNMT3A | TTCTACCGCCTCCTGCATGAT     | GCGAGATGTCCCTCTTGTCTACTA |
| DPF2   | GGCAGAGGAACAGGGAAGAT      | TGCTCCATGGCATCTTTGTA     |
| E2F1   | TGCAGAGCAGATGGTTATGG      | CTCAGGGCACAGGAAAACAT     |
| E2F6   | GCTCCAGCAGAAACCAGATT      | CCTGCTCCACTTCACACAAA     |
| EGR1   | AGCCCTACGAGCACCTGAC       | GGTTTGCTGGGGTAACTG       |
| ELF1   | CATCACCAGAACAGCCTAAGAG    | TTGTGTTTCCCTTTCCATCTTTG  |
| EP300  | TCTTCAGCACCATGGACAGT      | GTTGCATACGAGGCCATAG      |
| ERG    | CGCAGAGTTATCGTGCCAGCAGAT  | CCATATTCTTTCACCGCCCCTCC  |
| ESR1   | TTGCTCCTAACTTGCTCTTGG     | CGAGATGATGTAGCCAGCAG     |
| FLI1   | TACAACCTCCCACACCGACCA     | TGTTATTGCCCAAGCTCCTCT    |
| FOXA1  | AGGGCTGGATGTTGTATTG       | ACCGGGACGGAGGAGTAG       |
| FOXA2  | TGAACGGCATGAACACGTA       | GCCCACGTACGACGACAT       |
| FOXK1  | CAGTTACCGCTTTGTGCAGAA     | CGGCTTTGACTCATCCTTGG     |
| FOXM1  | GCAGCATCAAGCAAGAGATG      | GACGCTGATGGTCTCGAAG      |
| FOXO1  | AAGGGTGACAGCAACAGCTC      | TTCCCTTCATTCTGCACACGA    |
| FOXP1  | GGGGCAGTATGGACAGTGGATGA   | TTGAGAGGTGTGCAGTAGGCGTG  |
| GATA3  | ACTACGGAAACTCGGTCAGG      | GGTAGGGATCCATGAAGCAG     |
| GTF2B  | AGCAACAAAAGATCCATCTCG     | AAAACCTGCAGCTCCTGTGC     |
| HEY1   | CGCCTCTGCTCTCCTCAG        | GCTCAGTGCATTGGGAGAC      |
| HIF1A  | GATAGCAAGACTTTCCTCAGTCG   | TGGCTCATATCCCATCAATTC    |
| HMGB1  | GCCTCCTTCGGCCTTCTT        | ACAGGCCAGGATGTTCTCCTTT   |
| IGF1R  | GGCACAATTACTGCTCCAAAGAC   | CAAGGCCCTTTCTCCCCAC      |
| IRF1   | AGGCTACATGCAGGACTTG       | ACTGGGATGTGCCAGTCG       |
| JUN    | CGCCTGATAATCCAGTCCA       | TTCTTGGGGCACAGGAACT      |
| JUND   | CACAGTTCCTCTACCCCAAGG     | TTCTGCTTGTGTAATCCTCCA    |
| KDM2B  | GAGGAGAAGAAGAAGTGAAG      | TTGATGGGCTGCTGGTTC       |
| KDM5B  | AAAAGCACCAAATTAGAGAGTCTGA | TTCCCAAGAGTTGCCATAG      |
| KLF1   | ACACCAAGAGCTCCCACCT       | GTAGTGGCGGGTCAGCTC       |
| KMT2A  | TCCTGAATACAACCCCAATGA     | TGGCAGATCCATGCTAGTTG     |
| KMT2D  | AGGACCCCTTTGGACTGG        | GCCCCCGTAGGACTAGGATA     |
| MAX    | TGTTGTGTGCGGTGACTTCC      | CGTTATCGCTCATTTCCTACG    |
| MAZ    | AAGCGGTGAGGTTTGGAGGA      | CCCCATACCACCTTATGAA      |
| MED1   | AACACCTCATTGGAAGCTG       | GGACACACTTCAAATTGGAGAA   |
| MXI1   | CCAGCTGCCACCTCTCCAT       | TTGTAGGATAGAGGCTGTGATGCA |
| MYB    | GACTATGATGGGCTGCTTCC      | TGTTCCATTCTGTTCCACCA     |
| MYC    | CACCAGCAGCGACTCTGA        | CTGTGAGGAGGTTTGCTGTG     |
| MYCN   | GATGCACCCCCACAGAAGAA      | CTCCGAGTCAGAGTTTCGGG     |
| MYOD1  | CACTACAGCGGCGACTCC        | TAGGCGCTTCGTAGCAG        |



|                |                          |                          |
|----------------|--------------------------|--------------------------|
| <b>NFE2</b>    | GCTGTCCACTTCAGAGCTAGG    | GCTCACTTGGAGCATTTCAGA    |
| <b>NFKB1</b>   | ACCCTGACCTTGCCTATTTG     | AGCTCTTTTTCCCGATCTCC     |
| <b>NFKB2</b>   | CACATGGGTGGAGGCTCT       | ACTGGTAGGGGCTGTAGGC      |
| <b>NOTCH1</b>  | AGGCAATCCGAGGACTATGA     | GCTCAGAACGCACTCGTTG      |
| <b>NR3C1</b>   | TCCCTGGTGAACAGTTTTT      | GCTGGATGGAGGAGACTTA      |
| <b>NRF1</b>    | CAGTCACTATGGCGCTTAACA    | ATCTGTCCCCCACCTTGTA      |
| <b>PAX5</b>    | TGTCCCCCATATCTGTATGTCA   | GCTGATCCCAAGTCCAGTCT     |
| <b>RAG1</b>    | AATATCAACCAAATTGCAGACATC | GCCATGCTGGCTGAGGTA       |
| <b>RELA</b>    | ATGGCTTCTATGAGGCTGAGCT   | CACACACTGGATTCCCAGGTT    |
| <b>RUNX1</b>   | TCAGGTTTGTGGTGAAG        | GCCCATCCACTGTGATTTTG     |
| <b>RUNX2</b>   | ATCATCGCCGACCACCCGGC     | GGCTACCACCTTGAAGGCCACG   |
| <b>SKI</b>     | CAGAGGAGGACAAGGACTCG     | GAGGACAAGGAGGAGGTGAAT    |
| <b>SMARCC1</b> | GGACTGAACAGGAGACCCTTC    | CCGACACTTTGTTCCAATCA     |
| <b>SP1</b>     | GGACTGAACAGGAGACCCTTC    | CCGACACTTTGTTCCAATCA     |
| <b>STAT1</b>   | CTTGTTGGGGCACAAGGT       | CCATGGGAAAAGTGTCTATCA    |
| <b>STAT3</b>   | CCTGGTGTCTCCACTGGTCT     | TCTGGCCGACAATACTTTCC     |
| <b>TAF1</b>    | AAGGATGCTGGCTATGGTGA     | GTGTTCCAAGGGGCAGTG       |
| <b>TBX21</b>   | CCAACACGCATATCTTTACTTTCC | ACTCAAAGTTCTCCCGAATC     |
| <b>TCF12</b>   | CCGTGGCAGTCATCCTTAGT     | GCCGATACGGCAGAACTT       |
| <b>TCF3</b>    | GGCACCCACTTCACTGAGTC     | TCTCCGAAGGAGGCATA        |
| <b>TFAP2A</b>  | AACATGCTCCTGGCTACAAA     | AGGGGAGATCGGTCTCTGA      |
| <b>TFAP4</b>   | GAGGGCTCTGTAGCCTTGC      | GAATCCCGCGTTGATGCTCT     |
| <b>TRIM28</b>  | TGGTCAATGATGCCGAGA       | TTGGTCATGGTCCAGTGCT      |
| <b>YY1</b>     | GAAGCCCTTTCAGTGCACGTT    | ACATAGGGCCTGTCTCCGGTAT   |
| <b>ZBTB7A</b>  | CATCTGCGAGAAGGTCATCC     | TGTCCTGCCTGGTGAAGC       |
| <b>ZBTB17</b>  | TGGAGCTCAAGCCAGACC       | GGCTCCACCTCCATTTCTT      |
| <b>ZNF143</b>  | CAACGACACTGAGCCATC       | TCTGGGACCCTTTAAGAACATC   |
| <b>ZNF384</b>  | CCCAGATGAATGACCCTTA      | AGTAGAATGTCAGTGAGCACATCC |

**Supplementary Table 1C; ChIP-qPCR primer sets**

| <b>Region</b>     | <b>Forward</b>       | <b>Reverse</b>           |
|-------------------|----------------------|--------------------------|
| <b>IGF1R Pro0</b> | GGAGTCTCGCTTTGGGGAAA | AGTACCGACCCTAAGTCTCCGC   |
| <b>IGF1R Pro1</b> | TCGGGCTTTCCAGTACGCAG | CGGTTCTTGAAAAGCTTCATTGTT |
| <b>IGF1R Pro2</b> | AACCCGAGGAGGAGCGAGC  | GTGGGCAGGCTCGCTGG        |
